# Supplementary material for: Low-phosphate-selected Auxenochlorella protothecoides redirects phosphate to essential pathways while producing more biomass
Source: PLoS One. 2018 Jun 19;13(6):e0198953. doi: 10.1371/journal.pone.0198953 (PMC6007911; doi:10.1371/journal.pone.0198953)
Supplement: S1 Table — (XLSX) [file pone.0198953.s001.xlsx]

## Sheet: All transcripts
Selected transcripts that were significantly changed in the low phosphate adapted A. protothecoides
(log2 signal >1, FDR multiple test correction: adjusted p-value <0.1)
Name	Fold change	log2 fold change	Adjusted P value
Cpro00010093-RA	417.172	8.7045	0.0627	up
Cpro00010095-RA	87.042	6.44364	0.0627	up
Cpro00010094-RA	83.257	6.3795	0.0627	up
Cpro00010096-RA	83.257	6.3795	0.0627	up
Cpro00019769-RA	20.814	4.37948	0.0627	up
Cpro00008279-RA	20.183	4.33507	0.0627	up
Cpro00001440-RA	15.137	3.92001	0.0627	up
Cpro00007723-RA	14.191	3.8269	0.0627	up
Cpro00008746-RA	11.353	3.505	0.0627	up
Cpro00001229-RA	9.082	3.18301	0.0627	up
Cpro00001437-RA	8.83	3.14241	0.0627	up
Cpro00006465-RA	5.406	2.43456	0.0627	up
Cpro00001436-RA	4.075	2.0268	0.0627	up
Cpro00001435-RA	3.784	1.91991	0.0627	up
Cpro00019768-RA	3.279	1.71326	0.0627	up
Cpro00016146-RA_Auxenochlorella_protothecoides_glutamine_synthetase_II_[GSII]_mRNA,_complete_cds	15947.3	13.961	0.0627	down
Cpro00018701-RA_Micromonas_pusilla_CCMP1545_predicted_protein,_mRNA	7447.41	12.8625	0.0627	down
Cpro00025680-RA_Streptomyces_albulus_strain_NK660,_complete_genome	5519.69	12.4304	0.0627	down
Cpro00013471-RA_Chlorella_protothecoides_partial_mRNA_for_amino_acid_carrier_[dee4_gene]	4973.23	12.28	0.0627	down
Cpro00026568-RA_Chlorella_variabilis_hypothetical_protein_[CHLNCDRAFT_31559]_mRNA,_complete_cds	4648.5	12.1826	0.0627	down
Cpro00002508-RA_Chlorella_protothecoides_mRNA_for_putative_MO25_protein_[dee76_gene]	4022.57	11.9739	0.0627	down
Cpro00019347-RA_Clavibacter_michiganensis_subsp._sepedonicus_complete_genome	3391.94	11.7279	0.0627	down
Cpro00008565-RA_Chlamydomonas_reinhardtii_strain_CC-503_cw92_mt+	3315.48	11.695	0.0627	down
Cpro00003589-RA_Punctularia_strigosozonata_HHB-11173_SS5_serine/threonine_specific_protein_phosphatase_Sit4_[PUNSTDRAFT_86289],_mRNA	2944.81	11.524	0.0627	down
Cpro00004617-RA_Auxenochlorella_protothecoides_strain_0710_ATP-binding_cassette_transporter_mRNA,_complete_cds	2910.84	11.5072	0.0627	down
Cpro00003651-RA_Chlorella_variabilis_hypothetical_protein_[CHLNCDRAFT_32442]_mRNA,_complete_cds	2910.08	11.5068	0.0627	down
Cpro00023670-RA_Chlorella_variabilis_hypothetical_protein_[CHLNCDRAFT_58576]_mRNA,_complete_cds	2818.12	11.4605	0.0627	down
Cpro00012606-RA_Chlorella_variabilis_hypothetical_protein_[CHLNCDRAFT_34452]_mRNA,_complete_cds	2565.94	11.3253	0.0627	down
Cpro00003782-RA_Chlorella_protothecoides_mRNA_for_putative_MINE_protein_[dee22_gene]	2415.5	11.2381	0.0627	down
Cpro00008019-RA_Emiliania_huxleyi_CCMP1516_hypothetical_protein_[EMIHUDRAFT_71492]_mRNA,_partial_cds	2382.38	11.2182	0.0627	down
Cpro00021339-RA_Hordeum_vulgare_subsp._vulgare_mRNA_for_predicted_protein,_complete_cds,_clone,_NIASHv2022D03	2378.5	11.2158	0.0627	down
Cpro00016393-RA_Volvox_carteri_f._nagariensis_hypothetical_protein,_mRNA	2311.23	11.1744	0.0627	down
Cpro00022423-RA_Coccomyxa_subellipsoidea_C-169_ATP-binding_cassette_transporter_[COCSUDRAFT_16703]_mRNA,_partial_cds	2199.88	11.1032	0.0627	down
Cpro00020513-RA_Chlorella_variabilis_hypothetical_protein_[CHLNCDRAFT_23497]_mRNA,_partial_cds	2097.73	11.0346	0.0627	down
Cpro00016256-RA_Auxenochlorella_protothecoides_strain_0710_protein_kinase_mRNA,_partial_cds	2071.23	11.0163	0.0627	down
Cpro00014177-RA_Chlorella_variabilis_hypothetical_protein_[CHLNCDRAFT_59537]_mRNA,_complete_cds	2030.95	10.9879	0.0627	down
Cpro00009886-RA_Auxenochlorella_protothecoides_strain_0710_NADPH-dependent_FMN_reductase_mRNA,_partial_cds	1967.67	10.9423	0.0627	down
Cpro00008847-RA_Auxenochlorella_protothecoides_strain_0710_chloroplast_PetM_subunit_of_cytochrome_b6f_complex_mRNA,_partial_cds; _nuclear_gene_for_chloroplast_product	1873.97	10.8719	0.0627	down
Cpro00026122-RA_Chromobacterium_violaceum_ATCC_12472,_complete_genome	1873.97	10.8719	0.0627	down
Cpro00026859-RA_PREDICTED,_Pteropus_alecto_dual-specificity_tyrosine-[Y]-phosphorylation_regulated_kinase_1B_[DYRK1B],_transcript_variant_X3,_mRNA	1846.68	10.8507	0.0627	down
Cpro00004071-RA_Parabacteroides_distasonis_ATCC_8503,_complete_genome	1831.86	10.8391	0.0627	down
Cpro00014483-RA_Podospora_anserina_S_mat+_hypothetical_protein_[PODANSg10138]_partial_mRNA	1749.67	10.7729	0.0627	down
Cpro00007611-RA_Chlorella_variabilis_hypothetical_protein_[CHLNCDRAFT_19847]_mRNA,_complete_cds	1746.01	10.7698	0.0627	down
Cpro00021092-RA_Chlorella_variabilis_hypothetical_protein_[CHLNCDRAFT_57029]_mRNA,_complete_cds	1741.57	10.7662	0.0627	down
Cpro00021526-RA_Sebastes_schlegelii_mRNA,_clone,_BRF_26-D7,_induced_by_treatment_of_LPS_and_Con_A/PMA	1721.71	10.7496	0.0627	down
Cpro00009133-RA_Delftia_acidovorans_SPH-1,_complete_genome	1707.73	10.7379	0.0627	down
Cpro00006995-RA_Synechococcus_WH7803_complete_genome_sequence	1680.46	10.7146	0.0627	down
Cpro00023318-RA_Chlorella_variabilis_hypothetical_protein_[CHLNCDRAFT_142824]_mRNA,_complete_cds	1642.61	10.6818	0.0627	down
Cpro00011610-RA_Oryza_sativa_Japonica_Group_cDNA,_clone,_J090045P18,_full_insert_sequence	1638.77	10.6784	0.0627	down
Cpro00016339-RA_Micromonas_sp._RCC299_chromosome_4_mitochondrial_protein_translocase_family_[MICPUN_57768]_mRNA,_complete_cds; _nuclear_gene_for_mitochondrial_product	1605.12	10.6485	0.0627	down
Cpro00021534-RA_Colletotrichum_fioriniae_PJ7_helicase_associated_domain-containing_protein_mRNA	1560.37	10.6077	0.0627	down
Cpro00021445-RA_Frankia_sp._EuI1c,_complete_genome	1517.91	10.5679	0.0627	down
Cpro00024468-RA_Coccomyxa_subellipsoidea_C-169_Hydroxyisourate_hydrolase_[COCSUDRAFT_28529]_mRNA,_complete_cds	1486.56	10.5378	0.0627	down
Cpro00002389-RA_Auxenochlorella_protothecoides_strain_0710_sucrose_phosphate_synthase_mRNA,_complete_cds	1475.75	10.5272	0.0627	down
Cpro00015382-RA_Drosophila_pseudoobscura_pseudoobscura_GA15377_[Dpse\GA15377],_mRNA	1445.4	10.4973	0.0627	down
Cpro00010521-RA_Micromonas_pusilla_CCMP1545_predicted_protein,_mRNA	1443.06	10.4949	0.0627	down
Cpro00024491-RA_Chlorella_variabilis_hypothetical_protein_[CHLNCDRAFT_49152]_mRNA,_complete_cds	1425.85	10.4776	0.0627	down
Cpro00008059-RA_Micromonas_pusilla_CCMP1545_magnesium-chelatase_subunit_chli-like_protein_chloroplast_precursor_[CHLL2],_mRNA	1421.63	10.4733	0.0627	down
Cpro00005169-RA_Chlamydomonas_reinhardtii_strain_CC-503_cw92_mt+	1420.27	10.472	0.0627	down
Cpro00005456-RA_Chlamydomonas_reinhardtii_NADP_adrenodoxin-like_ferredoxin_reductase_[ARH1]_mRNA,_complete_cds	1419.3	10.471	0.0627	down
Cpro00024341-RA_Auxenochlorella_protothecoides_strain_0710_ribosomal_protein_S28e_mRNA,_partial_cds	1413.74	10.4653	0.0627	down
Cpro00002727-RA_Coccomyxa_subellipsoidea_C-169_T-complex_protein_1_beta_subunit_[COCSUDRAFT_68235]_mRNA,_complete_cds	1405.48	10.4568	0.0627	down
Cpro00012310-RA_Branchiostoma_floridae_hypothetical_protein,_mRNA	1385.11	10.4358	0.0627	down
Cpro00003610-RA_Clostridiales_sp._SS3/4_draft_genome	1366.43	10.4162	0.0627	down
Cpro00016700-RA_Prototheca_wickerhamii_Shwachman-Bodian-Diamond_protein-like_protein_mRNA,_partial_cds	1340.61	10.3887	0.0627	down
Cpro00009053-RA_Anaerolinea_thermophila_UNI-1_DNA,_complete_genome	1289.51	10.3326	0.0627	down
Cpro00014746-RA_Auxenochlorella_protothecoides_strain_0710_cytochrome_P450_like_protein_mRNA,_complete_cds	1284.47	10.327	0.0627	down
Cpro00002382-RA_PREDICTED,_Gallus_gallus_tetratricopeptide_repeat_protein_31-like_[LOC100858003],_transcript_variant_X1,_mRNA	1274.73	10.316	0.0627	down
Cpro00008212-RA_PREDICTED,_Myotis_lucifugus_aminomethyltransferase_[AMT],_mRNA	1268.76	10.3092	0.0627	down
Cpro00003777-RA_Volvox_carteri_f._nagariensis_hypothetical_protein,_mRNA	1264.35	10.3042	0.0627	down
Cpro00002546-RA_Pseudomonas_resinovorans_NBRC_106553_DNA,_complete_geonome	1245.36	10.2823	0.0627	down
Cpro00008998-RA_PREDICTED,_Lepisosteus_oculatus_GPN-loop_GTPase_1-like_[LOC102684698],_mRNA	1207.27	10.2375	0.0627	down
Cpro00023128-RA_PREDICTED,_Macaca_fascicularis_5-oxoprolinase_[ATP-hydrolysing]_[OPLAH],_transcript_variant_X4,_misc_RNA	1189.25	10.2158	0.0627	down
Cpro00001739-RA_Drosophila_simulans_GD23728_[Dsim\GD23728],_mRNA	1183.56	10.2089	0.0627	down
Cpro00012344-RA_PREDICTED,_Cavia_porcellus_tubulin_tyrosine_ligase-like_family,_member_1_[Ttll1],_transcript_variant_X4,_mRNA	1161.05	10.1812	0.0627	down
Cpro00020538-RA_Chlorella_variabilis_hypothetical_protein_[ZEP]_mRNA,_complete_cds	1150.43	10.168	0.0627	down
Cpro00000917-RA_Natronococcus_occultus_SP4,_complete_genome	1146.5	10.163	0.0627	down
Cpro00014691-RA_Selaginella_moellendorffii_Sar1,_ras_family_GTPase_[Sar1b-1],_mRNA	1130.18	10.1423	0.0627	down
Cpro00014070-RA_Volvox_carteri_f._nagariensis_hypothetical_protein,_mRNA	1128.93	10.1407	0.0627	down
Cpro00024890-RA_Chlorella_variabilis_hypothetical_protein_[CHLNCDRAFT_49837]_mRNA,_complete_cds	1125.16	10.1359	0.0627	down
Cpro00015727-RA_Chlorella_variabilis_hypothetical_protein_[CHLNCDRAFT_26891]_mRNA,_complete_cds	1124.38	10.1349	0.0627	down
Cpro00020273-RA_Chlorella_variabilis_hypothetical_protein_[CHLNCDRAFT_33715]_mRNA,_complete_cds	1119.17	10.1282	0.0627	down
Cpro00016639-RA_PREDICTED,_Monodelphis_domestica_ADP-ribosylation_factor-like_2_[ARL2],_mRNA	1111.31	10.118	0.0627	down
Cpro00017833-RA_Chlorella_variabilis_expressed_protein_[CHLNCDRAFT_57095]_mRNA,_complete_cds	1106.98	10.1124	0.0627	down
Cpro00003869-RA_Coccomyxa_subellipsoidea_C-169_hypothetical_protein_[COCSUDRAFT_63858]_mRNA,_complete_cds	1103.56	10.1079	0.0627	down
Cpro00013764-RA_Culex_quinquefasciatus_ubiquitin_specific_protease,_mRNA	1086.59	10.0856	0.0627	down
Cpro00012964-RA_Telonema_subtilis_partial_mRNA_for_spliceosome_RNA_helicase_BAT1,_contig_02979	1076.19	10.0717	0.0627	down
Cpro00001724-RA_Clavispora_lusitaniae_ATCC_42720_hypothetical_protein,_mRNA	1066.61	10.0588	0.0627	down
Cpro00002571-RA_Chlamydomonas_reinhardtii_strain_CC-503_cw92_mt+	1060.84	10.051	0.0627	down
Cpro00015548-RA_Chlorella_variabilis_hypothetical_protein_[CHLNCDRAFT_139059]_mRNA,_complete_cds	1054.11	10.0418	0.0627	down
Cpro00022969-RA_Chlorella_variabilis_hypothetical_protein_[CHLNCDRAFT_31189]_mRNA,_complete_cds	1051.84	10.0387	0.0627	down
Cpro00007691-RA_Chlorella_variabilis_hypothetical_protein_[CHLNCDRAFT_11560]_mRNA,_partial_cds	1043.32	10.027	0.0627	down
Cpro00013478-RA_Chlorella_variabilis_hypothetical_protein_[CHLNCDRAFT_56869]_mRNA,_complete_cds	1030.68	10.0094	0.0627	down
Cpro00014390-RA_Chlorella_variabilis_hypothetical_protein_[CHLNCDRAFT_30881]_mRNA,_complete_cds	1019.22	9.99325	0.0627	down
Cpro00016566-RA_Anaeromyxobacter_dehalogenans_2CP-1,_complete_genome	1010.96	9.9815	0.0627	down
Cpro00003170-RA_Volvox_carteri_f._nagariensis_trypsin_family_[deg1C],_mRNA	1007.87	9.9771	0.0627	down
Cpro00021156-RA_Auxenochlorella_protothecoides_culture-collection_CGMCC,2578_cytosine/adenosine_deaminase-like_protein_mRNA,_partial_cds	1002.17	9.96891	0.0627	down
Cpro00012282-RA_PREDICTED,_Poecilia_formosa_chromodomain-helicase-DNA-binding_protein_4-like_[LOC103146445],_transcript_variant_X3,_mRNA	984.728	9.94358	0.0627	down
Cpro00022199-RA_Prototheca_wickerhamii_plastid_adenylosuccinate_synthetase_mRNA,_partial_cds; _nuclear_gene_for_plastid_product	982.691	9.94059	0.0627	down
Cpro00017688-RA_Sorghum_bicolor_hypothetical_protein,_mRNA	980.948	9.93803	0.0627	down
Cpro00014908-RA_Auxenochlorella_protothecoides_strain_0710_acyl_groups_transferase_mRNA,_complete_cds	977.722	9.93328	0.0627	down
Cpro00026119-RA_Chlamydomonas_reinhardtii_ABC-1-like_kinase_[AKC4]_mRNA,_partial_cds	973.022	9.92633	0.0627	down
Cpro00013724-RA_Chlorella_variabilis_hypothetical_protein_[CHLNCDRAFT_16774]_mRNA,_partial_cds	970.574	9.92269	0.0627	down
Cpro00024703-RA_Chlamydomonas_reinhardtii_strain_CC-503_cw92_mt+	965.814	9.9156	0.0627	down
Cpro00012778-RA_Auxenochlorella_protothecoides_strain_0710_glucan_synthase_mRNA,_complete_cds	958.279	9.9043	0.0627	down
Cpro00005557-RA_Pseudomonas_chlororaphis_strain_PA23,_complete_genome	957.178	9.90264	0.0627	down
Cpro00017034-RA_Auxenochlorella_protothecoides_strain_0710_phenazine_biosynthesis_protein_mRNA,_partial_cds	948.273	9.88916	0.0627	down
Cpro00008914-RA_Chlamydomonas_reinhardtii_predicted_protein_[CHLREDRAFT_126079]_mRNA,_complete_cds	947.512	9.888	0.0627	down
Cpro00018439-RA_PREDICTED,_Vitis_vinifera_malate_dehydrogenase,_cytoplasmic-like_[LOC100256452],_mRNA	946.545	9.88653	0.0627	down
Cpro00021054-RA_Chlamydomonas_reinhardtii_clone_1031030C06_lumen_thiol_oxidase_1_[LTO1]_mRNA,_complete_cds	936.984	9.87188	0.0627	down
Cpro00012281-RA_Coccomyxa_subellipsoidea_C-169_hypothetical_protein_[COCSUDRAFT_47361]_mRNA,_complete_cds	936.984	9.87188	0.0627	down
Cpro00001053-RA_PREDICTED,_Columba_livia_propionyl_CoA_carboxylase,_beta_polypeptide_[PCCB],_mRNA	936.984	9.87188	0.0627	down
Cpro00017244-RA_Chlorella_variabilis_hypothetical_protein_[CHLNCDRAFT_58876]_mRNA,_complete_cds	933.408	9.86636	0.0627	down
Cpro00012300-RA_Chlorella_variabilis_hypothetical_protein_[CHLNCDRAFT_143607]_mRNA,_complete_cds	930.653	9.8621	0.0627	down
Cpro00002386-RA_Auxenochlorella_protothecoides_strain_0710_sucrose_phosphate_synthase_mRNA,_complete_cds	928.504	9.85876	0.0627	down
Cpro00022671-RA_Chlorella_variabilis_hypothetical_protein_[CHLNCDRAFT_137278]_mRNA,_complete_cds	911.66	9.83235	0.0627	down
Cpro00020932-RA_Deinococcus_maricopensis_DSM_21211,_complete_genome	903.52	9.81941	0.0627	down
Cpro00013431-RA_PREDICTED,_Dasypus_novemcinctus_SNF2_histone_linker_PHD_RING_helicase,_E3_ubiquitin_protein_ligase_[SHPRH],_transcript_variant_6,_mRNA	900.342	9.81433	0.0627	down
Cpro00014909-RA_Auxenochlorella_protothecoides_strain_0710_acyl_groups_transferase_mRNA,_complete_cds	893.258	9.80293	0.0627	down
Cpro00012035-RA_Pseudozyma_flocculosa_PF-1_hypothetical_protein_partial_mRNA	881.176	9.78329	0.0627	down
Cpro00014701-RA_Geobacter_metallireducens_GS-15,_complete_genome	872.917	9.7697	0.0627	down
Cpro00008515-RA_Auxenochlorella_protothecoides_strain_0710_cytochrome_P450_like_protein_mRNA,_complete_cds	868.088	9.7617	0.0627	down
Cpro00018668-RA_Methylomonas_methanica_MC09,_complete_genome	861.053	9.74996	0.0627	down
Cpro00003374-RA_Oryza_sativa_[indica_cultivar-group]_genomic_sequence	858.902	9.74635	0.0627	down
Cpro00002392-RA_Auxenochlorella_protothecoides_strain_0710_sucrose_phosphate_synthase_mRNA,_complete_cds	855.507	9.74064	0.0627	down
Cpro00002819-RA_Chlorella_variabilis_hypothetical_protein_[CHLNCDRAFT_138311]_mRNA,_complete_cds	855.507	9.74064	0.0627	down
Cpro00006730-RA_Chlorella_variabilis_hypothetical_protein_[CHLNCDRAFT_55997]_mRNA,_complete_cds	851.804	9.73438	0.0627	down
Cpro00001185-RA_Neofusicoccum_parvum_UCRNP2_putative_mrna_binding_post-transcriptional_regulator_protein_mRNA	846.889	9.72603	0.0627	down
Cpro00009057-RA_Enterobacter_sacchari_SP1,_complete_genome	845.571	9.72378	0.0627	down
Cpro00019897-RA_PREDICTED,_Felis_catus_pantothenate_kinase_4_[PANK4],_mRNA	823.07	9.68487	0.0627	down
Cpro00023628-RA_Ixodes_scapularis_protein_disulfide_isomerase_1,_putative,_mRNA	822.718	9.68425	0.0627	down
Cpro00022347-RA_Chlorella_variabilis_hypothetical_protein_[CHLNCDRAFT_25367]_mRNA,_complete_cds	822.464	9.68381	0.0627	down
Cpro00023408-RA_Chlorella_variabilis_hypothetical_protein_[CHLNCDRAFT_142203]_mRNA,_complete_cds	821.846	9.68272	0.0627	down
Cpro00005436-RA_Thermomonospora_curvata_DSM_43183,_complete_genome	819.235	9.67813	0.0627	down
Cpro00018898-RA_Chlamydomonas_reinhardtii_predicted_protein_[CHLREDRAFT_79407]_mRNA,_complete_cds	814.769	9.67025	0.0627	down
Cpro00025511-RA_Chlorella_variabilis_hypothetical_protein_[CHLNCDRAFT_56509]_mRNA,_complete_cds	810.6	9.66285	0.0627	down
Cpro00025713-RA_Cupriavidus_necator_N-1_chromosome_2,_complete_sequence	804.234	9.65147	0.0627	down
Cpro00007562-RA_PREDICTED,_Pantholops_hodgsonii_probable_copper-transporting_ATPase_HMA5-like_[LOC102324633],_mRNA	803.129	9.64949	0.0627	down
Cpro00005176-RA_Drosophila_virilis_GJ17053_[Dvir\GJ17053],_mRNA	803.129	9.64949	0.0627	down
Cpro00014542-RA_Streptomyces_griseus_subsp._griseus_NBRC_13350_DNA,_complete_genome	800.695	9.64511	0.0627	down
Cpro00018350-RA_Dichomitus_squalens_LYAD-421_SS1_glycosyltransferase_family_15_protein_[DICSQDRAFT_85385],_mRNA	794.585	9.63406	0.0627	down
Cpro00022828-RA_Chlorella_variabilis_hypothetical_protein_[CHLNCDRAFT_23687]_mRNA,_partial_cds	781.162	9.60948	0.0627	down
Cpro00002799-RA_Chlamydomonas_reinhardtii_predicted_protein_[CHLREDRAFT_116646]_mRNA,_partial_cds	778.277	9.60414	0.0627	down
Cpro00020619-RA_PREDICTED,_Octodon_degus_DEAH_[Asp-Glu-Ala-His]_box_polypeptide_8_[Dhx8],_mRNA	774.75	9.59759	0.0627	down
Cpro00008169-RA_Chlamydomonas_reinhardtii_cytochrome_P450_[CYP746A1]_mRNA,_complete_cds	772.513	9.59342	0.0627	down
Cpro00008899-RA_Haliangium_ochraceum_DSM_14365,_complete_genome	769.166	9.58715	0.0627	down
Cpro00025981-RA_Prototheca_wickerhamii_plastid_protein_disulfide_isomerase_mRNA,_partial_cds; _nuclear_gene_for_plastid_product	766.1	9.58139	0.0627	down
Cpro00023132-RA_PREDICTED,_Elephantulus_edwardii_5-oxoprolinase_[ATP-hydrolysing]_[OPLAH],_mRNA	754.885	9.56011	0.0627	down
Cpro00007506-RA_Ralstonia_eutropha_H16_chromosome_2	754.618	9.5596	0.0627	down
Cpro00016388-RA_Chlamydomonas_reinhardtii_strain_CC-503_cw92_mt+	753.661	9.55777	0.0627	down
Cpro00005296-RA_Sorghum_bicolor_hypothetical_protein,_mRNA	741.269	9.53385	0.0627	down
Cpro00020821-RA_Chlorella_variabilis_hypothetical_protein_[CHLNCDRAFT_31300]_mRNA,_complete_cds	741.069	9.53346	0.0627	down
Cpro00001174-RA_Coccomyxa_subellipsoidea_C-169_hypothetical_protein_[COCSUDRAFT_11236]_mRNA,_partial_cds	732.93	9.51753	0.0627	down
Cpro00020557-RA_Burkholderia_thailandensis_USAMRU_Malaysia_#20_chromosome_1,_complete_sequence	729.766	9.51129	0.0627	down
Cpro00008202-RA_Chlorella_variabilis_hypothetical_protein_[CHLNCDRAFT_143584]_mRNA,_complete_cds	725.214	9.50226	0.0627	down
Cpro00002880-RA_Volvox_carteri_f._nagariensis_hypothetical_protein,_mRNA	719.878	9.49161	0.0627	down
Cpro00002593-RA_Bos_taurus_BTA21_scaffold125212_13312_genomic_sequence_contig_containing_highly_polymorphic_single_nucleotide_sites	713.549	9.47887	0.0627	down
Cpro00002818-RA_PREDICTED,_Ornithorhynchus_anatinus_DEAH_[Asp-Glu-Ala-His]_box_helicase_30_[DHX30],_partial_mRNA	698.855	9.44885	0.0627	down
Cpro00015210-RA_Chlamydomonas_reinhardtii_NADPH-dependent_thioredoxin_reductase_[NTRC1]_mRNA,_complete_cds	683.364	9.41651	0.0627	down
Cpro00020123-RA_Thioalkalivibrio_sulfidophilus_HL-EbGr7,_complete_genome	679.424	9.40817	0.0627	down
Cpro00013741-RA_Chlorella_variabilis_hypothetical_protein_[CHLNCDRAFT_140851]_mRNA,_complete_cds	678.386	9.40596	0.0627	down
Cpro00016532-RA_Prototheca_wickerhamii_50S_ribosomal_protein_L20-related_protein-like_mRNA,_partial_sequence	673.045	9.39456	0.0627	down
Cpro00003379-RA_PREDICTED,_Brachypodium_distachyon_histone_deacetylase_19-like_[LOC100843648],_mRNA	667.795	9.38326	0.0627	down
Cpro00016583-RA_Nephroselmis_olivacea_ftsZ2_mRNA_for_chloroplast_division_protein,_partial_cds	666.356	9.38015	0.0627	down
Cpro00002544-RA_Dinoroseobacter_shibae_DFL_12,_complete_genome	665.278	9.37781	0.0627	down
Cpro00025152-RA_Chlorella_variabilis_hypothetical_protein_[CHLNCDRAFT_28217]_mRNA,_partial_cds	665.091	9.37741	0.0627	down
Cpro00017727-RA_Auxenochlorella_protothecoides_strain_0710_plastid_integral_membrane_protein_mRNA,_complete_cds; _nuclear_gene_for_plastid_product	663.697	9.37438	0.0627	down
Cpro00023129-RA_PREDICTED,_Macaca_fascicularis_5-oxoprolinase_[ATP-hydrolysing]_[OPLAH],_transcript_variant_X4,_misc_RNA	663.096	9.37307	0.0627	down
Cpro00007280-RA_Desulfococcus_oleovorans_Hxd3,_complete_genome	662.581	9.37195	0.0627	down
Cpro00003913-RA_Coccomyxa_subellipsoidea_C-169_LL-diaminopimelate_aminotransferase_[COCSUDRAFT_23979]_mRNA,_complete_cds	660.291	9.36696	0.0627	down
Cpro00015126-RA_Thioalkalivibrio_sulfidophilus_HL-EbGr7,_complete_genome	660.148	9.36665	0.0627	down
Cpro00010033-RA_Auxenochlorella_protothecoides_strain_0710_OST3/OST6_family_protein_mRNA,_partial_cds	659.12	9.3644	0.0627	down
Cpro00015089-RA_PREDICTED,_Poecilia_formosa_transmembrane_protein_184B_[tmem184b],_transcript_variant_X2,_mRNA	656.689	9.35907	0.0627	down
Cpro00009192-RA_Rhodospirillum_rubrum_F11,_complete_genome	647.466	9.33866	0.0627	down
Cpro00013601-RA_Chlorella_variabilis_hypothetical_protein_[CHLNCDRAFT_143672]_mRNA,_complete_cds	642.503	9.32756	0.0627	down
Cpro00019900-RA_PREDICTED,_Ailuropoda_melanoleuca_pantothenate_kinase_4-like_[LOC100474061],_mRNA	638.344	9.31819	0.0627	down
Cpro00027101-RA_Chlorella_variabilis_hypothetical_protein_[CHLNCDRAFT_58332]_mRNA,_complete_cds	638.235	9.31794	0.0627	down
Cpro00000225-RA_PREDICTED,_Meleagris_gallopavo_ATP-binding_cassette,_sub-family_C_[CFTR/MRP],_member_2_[ABCC2],_mRNA	633.644	9.30753	0.0627	down
Cpro00022425-RA_Pseudomonas_entomophila_str._L48_chromosome,complete_sequence	628.146	9.29496	0.0627	down
Cpro00007796-RA_Chlorella_variabilis_hypothetical_protein_[CHLNCDRAFT_36454]_mRNA,_complete_cds	623.706	9.28472	0.0627	down
Cpro00003671-RA_Chlorella_variabilis_hypothetical_protein_[CHLNCDRAFT_135406]_mRNA,_complete_cds	620.6	9.27752	0.0627	down
Cpro00006142-RA_Chlorella_variabilis_hypothetical_protein_[CHLNCDRAFT_16754]_mRNA,_partial_cds	617.322	9.26988	0.0627	down
Cpro00017769-RA_Burkholderia_gladioli_BSR3_chromosome_1,_complete_sequence	615.49	9.26559	0.0627	down
Cpro00010575-RA_Chlamydomonas_reinhardtii_strain_CC-503_cw92_mt+	604.746	9.24019	0.0627	down
Cpro00016032-RA_Chlamydomonas_reinhardtii_type_I_polyketide_synthase_[CHLREDRAFT_196903]_mRNA,_complete_cds	598.315	9.22476	0.0627	down
Cpro00016403-RA_Chlamydomonas_reinhardtii_dihydrolipoamide_dehydrogenase_[DLD2]_mRNA,_complete_cds	597.198	9.22207	0.0627	down
Cpro00025855-RA_Chlorella_variabilis_hypothetical_protein_[CHLNCDRAFT_135824]_mRNA,_complete_cds	596.787	9.22107	0.0627	down
Cpro00018415-RA_Chlorella_variabilis_hypothetical_protein_[CHLNCDRAFT_56301]_mRNA,_complete_cds	595.191	9.21721	0.0627	down
Cpro00021844-RA_Hordeum_vulgare_subsp._vulgare_mRNA_for_predicted_protein,_complete_cds,_clone,_NIASHv1073K05	595.111	9.21701	0.0627	down
Cpro00021939-RA_Auxenochlorella_protothecoides_strain_0710_26S_proteasome_regulatory_complex_mRNA,_partial_cds	593.863	9.21399	0.0627	down
Cpro00013907-RA_Mus_musculus_targeted_non-conditional,_lacZ-tagged_mutant_allele_Fcgr3,tm1e[EUCOMM]Hmgu; _transgenic	591.779	9.20891	0.0627	down
Cpro00023625-RA_Chlamydomonas_reinhardtii_strain_CC-503_cw92_mt+	590.707	9.2063	0.0627	down
Cpro00012782-RA_Auxenochlorella_protothecoides_strain_0710_glucan_synthase_mRNA,_complete_cds	589.71	9.20386	0.0627	down
Cpro00004198-RA_Chlorella_variabilis_hypothetical_protein_[CHLNCDRAFT_32043]_mRNA,_complete_cds	586.633	9.19631	0.0627	down
Cpro00014304-RA_Anaeromyxobacter_dehalogenans_2CP-C,_complete_genome	584.678	9.1915	0.0627	down
Cpro00021311-RA_PREDICTED,_Ornithorhynchus_anatinus_solute_carrier_family_9,_subfamily_A_[NHE7,_cation_proton_antiporter_7],_member_7_[SLC9A7],_mRNA	580.522	9.18121	0.0627	down
Cpro00012918-RA_Sporisorium_reilianum_SRZ2_chromosome_18_complete_DNA_sequence	575.737	9.16927	0.0627	down
Cpro00010574-RA_Chlamydomonas_reinhardtii_strain_CC-503_cw92_mt+	573.323	9.1632	0.0627	down
Cpro00020718-RA_Synergistetes_sp._SGP1_draft_genome	569.088	9.15251	0.0627	down
Cpro00011114-RA_Chlamydomonas_reinhardtii_strain_CC-503_cw92_mt+	560.242	9.12991	0.0627	down
Cpro00008150-RA_Rubrivivax_gelatinosus_IL144_DNA,_complete_genome	553.718	9.11301	0.0627	down
Cpro00023449-RA_Auxenochlorella_protothecoides_strain_0710_50S_ribosomal_protein_L27_mRNA,_partial_cds	549.969	9.10321	0.0627	down
Cpro00019247-RA_Coccomyxa_subellipsoidea_C-169_hypothetical_protein_[COCSUDRAFT_47226]_mRNA,_complete_cds	546.574	9.09427	0.0627	down
Cpro00006603-RA_Chlorella_variabilis_hypothetical_protein_[CHLNCDRAFT_52248]_mRNA,_complete_cds	544.758	9.08947	0.0627	down
Cpro00002505-RA_Gordonia_sp._KTR9,_complete_genome	544.055	9.08761	0.0627	down
Cpro00005556-RA_Pseudomonas_chlororaphis_strain_PA23,_complete_genome	542.27	9.08287	0.0627	down
Cpro00000646-RA_Starkeya_novella_DSM_506,_complete_genome	538.07	9.07165	0.0627	down
Cpro00008339-RA_Colletotrichum_gloeosporioides_Nara_gc5_patched_sphingolipid_transporter_[CGGC5_1941],_partial_mRNA	536.499	9.06743	0.0627	down
Cpro00005315-RA_Chlorella_variabilis_hypothetical_protein_[CHLNCDRAFT_134632]_mRNA,_complete_cds	531.325	9.05345	0.0627	down
Cpro00023919-RA_Auxenochlorella_protothecoides_strain_0710_hypothetical_protein_CHLPROCp011_mRNA,_partial_cds	530.179	9.05034	0.0627	down
Cpro00027099-RA_Chlorella_variabilis_hypothetical_protein_[CHLNCDRAFT_58332]_mRNA,_complete_cds	528.793	9.04656	0.0627	down
Cpro00002817-RA_PREDICTED,_Ornithorhynchus_anatinus_DEAH_[Asp-Glu-Ala-His]_box_helicase_30_[DHX30],_partial_mRNA	528.024	9.04446	0.0627	down
Cpro00011197-RA_Volvox_carteri_f._nagariensis_hypothetical_protein,_mRNA	525.92	9.0387	0.0627	down
Cpro00011669-RA_Chlorella_variabilis_hypothetical_protein_[CHLNCDRAFT_137851]_mRNA,_complete_cds	524.711	9.03538	0.0627	down
Cpro00012211-RA_PREDICTED,_Balaenoptera_acutorostrata_scammoni_aspartylglucosaminidase_[AGA],_mRNA	517.931	9.01662	0.0627	down
Cpro00026700-RA_Chlamydomonas_reinhardtii_bifunctional_aspartate_kinase/homoserine_dehydrogenase_[AHD1]_mRNA,_complete_cds	513.539	9.00433	0.0627	down
Cpro00009134-RA_Acidovorax_sp._KKS102,_complete_genome	511.977	8.99994	0.0627	down
Cpro00005726-RA_Chitiniphilus_shinanonensis_chiM,_chiL,_cseA,_cseB,_cseC,_cseD,_cseE,_cseF,_cseG,_cseH,_cseI,_cseJ_genes_for_family_18_chitinase,_family_18_chitinase,_CMP/dCMP_deaminase_zinc-binding_protein,_DNA_repair_protein_RecN,_inorganic_polyphosphate/ATP-NAD_kinase,_heat-inducible_transcription_repressor_HrcA,_lytic_murein_transglycosylase_B,_hypothetical_protein,_hemerythrin-like_metal-bin…	509.301	8.99237	0.0627	down
Cpro00010204-RA_Micromonas_pusilla_CCMP1545_predicted_protein,_mRNA	508.281	8.98948	0.0627	down
Cpro00017033-RA_Auxenochlorella_protothecoides_strain_0710_phenazine_biosynthesis_protein_mRNA,_partial_cds	505.971	8.98291	0.0627	down
Cpro00001726-RA_Clavispora_lusitaniae_ATCC_42720_hypothetical_protein,_mRNA	504.033	8.97737	0.0627	down
Cpro00010035-RA_Auxenochlorella_protothecoides_strain_0710_OST3/OST6_family_protein_mRNA,_partial_cds	502.876	8.97406	0.0627	down
Cpro00022970-RA_Chlorella_variabilis_hypothetical_protein_[CHLNCDRAFT_31189]_mRNA,_complete_cds	501.177	8.96918	0.0627	down
Cpro00006386-RA_Ashbya_gossypii_FDAG1_chromosome_II,_complete_sequence	500.254	8.96652	0.0627	down
Cpro00011901-RA_Lachancea_thermotolerans_CBS_6340_KLTH0G18194p_[KLTH0G18194g]_mRNA,_complete_cds	499.466	8.96424	0.0627	down
Cpro00004751-RA_Chlorella_variabilis_hypothetical_protein_[CHLNCDRAFT_21860]_mRNA,_partial_cds	493.63	8.94729	0.0627	down
Cpro00010392-RA_Chaetomium_globosum_CBS_148.51_hypothetical_protein_[CHGG_05676]_partial_mRNA	489.787	8.93601	0.0627	down
Cpro00025824-RA_Chlamydomonas_reinhardtii_strain_CC-503_cw92_mt+	488.129	8.93112	0.0627	down
Cpro00000774-RA_Chlorella_variabilis_hypothetical_protein_[CHLNCDRAFT_34185]_mRNA,_complete_cds	484.183	8.91941	0.0627	down
Cpro00026641-RA_Micromonas_sp._RCC299_chromosome_8_predicted_protein_[MICPUN_84366]_mRNA,_complete_cds	481.877	8.91252	0.0627	down
Cpro00019089-RA_Corynebacterium_halotolerans_YIM_70093_=_DSM_44683,_complete_genome	477.501	8.89936	0.0627	down
Cpro00008575-RA_Chlorella_variabilis_hypothetical_protein_[CHLNCDRAFT_57818]_mRNA,_complete_cds	475.835	8.89432	0.0627	down
Cpro00021878-RA_Selaginella_moellendorffii_hypothetical_protein,_mRNA	474.422	8.89003	0.0627	down
Cpro00015445-RA_Acanthamoeba_castellanii_str._Neff_aspartate_aminotransferase,_cytoplasmic,_putative_[ACA1_155560]_mRNA,_complete_cds	471.768	8.88193	0.0627	down
Cpro00007618-RA_PREDICTED,_Equus_caballus_methylthioribose-1-phosphate_isomerase_1_[MRI1],_partial_mRNA	470.8	8.87897	0.0627	down
Cpro00012874-RA_Desulfococcus_oleovorans_Hxd3,_complete_genome	470.091	8.8768	0.0627	down
Cpro00005607-RA_Chlamydomonas_reinhardtii_predicted_protein_[CHLREDRAFT_113687]_mRNA,_partial_cds	466.662	8.86623	0.0627	down
Cpro00016404-RA_Chlamydomonas_reinhardtii_dihydrolipoamide_dehydrogenase_[DLD2]_mRNA,_complete_cds	465.72	8.86332	0.0627	down
Cpro00019629-RA_Chlorella_variabilis_hypothetical_protein_[CHLNCDRAFT_21975]_mRNA,_partial_cds	465.479	8.86257	0.0627	down
Cpro00023131-RA_Neofusicoccum_parvum_UCRNP2_putative_5-oxoprolinase_protein_mRNA	464.969	8.86099	0.0627	down
Cpro00005181-RA_PREDICTED,_Myotis_lucifugus_TNF_receptor-associated_factor_3_[TRAF3],_transcript_variant_X3,_mRNA	463.853	8.85752	0.0627	down
Cpro00022264-RA_Coccomyxa_subellipsoidea_C-169_AAA-domain-containing_protein_[COCSUDRAFT_14939]_mRNA,_complete_cds	461.893	8.85141	0.0627	down
Cpro00006025-RA_Auxenochlorella_protothecoides_culture-collection_CGMCC,2578_4-alpha-glucanotransferase_mRNA,_partial_cds	448.653	8.80946	0.0627	down
Cpro00000354-RA_Cellulomonas_fimi_ATCC_484,_complete_genome	445.451	8.79912	0.0627	down
Cpro00002034-RA_Sorghum_bicolor_hypothetical_protein,_mRNA	440.269	8.78224	0.0627	down
Cpro00023330-RA_Chlorella_variabilis_hypothetical_protein_[CHLNCDRAFT_57209]_mRNA,_complete_cds	432.044	8.75503	0.0627	down
Cpro00008982-RA_Chlamydomonas_reinhardtii_T-complex_protein,_delta_subunit_[CCT4]_mRNA,_partial_cds	431.803	8.75423	0.0627	down
Cpro00025599-RA_Chlorella_variabilis_hypothetical_protein_[CHLNCDRAFT_56737]_mRNA,_complete_cds	430.187	8.74882	0.0627	down
Cpro00017325-RA_Chlorella_variabilis_hypothetical_protein_[CHLNCDRAFT_15191]_mRNA,_partial_cds	429.04	8.74497	0.0627	down
Cpro00010561-RA_Comamonadaceae_bacterium_A1_DNA,_complete_genome	427.521	8.73985	0.0627	down
Cpro00009622-RA_Salpingoeca_sp._ATCC_50818_ATP-dependent_helicase_NAM7_[PTSG_02750]_mRNA,_complete_cds	426.662	8.73695	0.0627	down
Cpro00021509-RA_Blastococcus_saxobsidens_DD2_complete_genome	414.594	8.69556	0.0627	down
Cpro00004753-RA_Chlorella_variabilis_hypothetical_protein_[CHLNCDRAFT_21860]_mRNA,_partial_cds	414.016	8.69354	0.0627	down
Cpro00004836-RA_Chlorella_variabilis_hypothetical_protein_[CHLNCDRAFT_9136]_mRNA,_partial_cds	409.837	8.67891	0.0627	down
Cpro00024342-RA_Chlamydomonas_reinhardtii_anthranilate_phosphoribosyltransferase_[PRT1]_mRNA,_complete_cds	407.037	8.66902	0.0627	down
Cpro00024898-RA_Chlorella_variabilis_hypothetical_protein_[CHLNCDRAFT_137692]_mRNA,_complete_cds	401.564	8.64949	0.0627	down
Cpro00000168-RA_Auxenochlorella_protothecoides_strain_0710_PHD-typetranscription_factor_mRNA,_complete_cds	399.085	8.64055	0.0627	down
Cpro00018418-RA_Chlorella_variabilis_hypothetical_protein_[CHLNCDRAFT_56301]_mRNA,_complete_cds	398.514	8.63849	0.0627	down
Cpro00022617-RA_PREDICTED,_Heterocephalus_glaber_DEAH_[Asp-Glu-Ala-His]_box_polypeptide_8_[Dhx8],_transcript_variant_X2,_mRNA	393.842	8.62147	0.0627	down
Cpro00025604-RA_Dickeya_dadantii_3937,_complete_genome	392.763	8.61752	0.0627	down
Cpro00001937-RA_PREDICTED,_Meleagris_gallopavo_abhydrolase_domain-containing_protein_FAM108A-like_[LOC100547449],_partial_mRNA	392.032	8.61483	0.0627	down
Cpro00000489-RA_PREDICTED,_Prunus_mume_protein_unc-50_homolog_[LOC103335151],_mRNA	386.932	8.59594	0.0627	down
Cpro00008608-RA_Chlorella_variabilis_hypothetical_protein_[CHLNCDRAFT_59118]_mRNA,_partial_cds	377.188	8.55914	0.0627	down
Cpro00003158-RA_Hordeum_vulgare_subsp._vulgare_mRNA_for_predicted_protein,_partial_cds,_clone,_NIASHv2104L15	369.606	8.52984	0.0627	down
Cpro00005305-RA_Methylobacterium_extorquens_AM1,_complete_genome	367.925	8.52327	0.0627	down
Cpro00009497-RA_Coccomyxa_subellipsoidea_C-169_DNA_replication_factor_C_complex_subunit_5_[COCSUDRAFT_29598]_mRNA,_complete_cds	367.711	8.52243	0.0627	down
Cpro00009615-RA_Chlamydomonas_reinhardtii_UPF1_protein_[UPF1]_mRNA,_partial_cds	366.838	8.519	0.0627	down
Cpro00019166-RA_Rhodanobacter_sp._2APBS1,_complete_genome	363.77	8.50688	0.0627	down
Cpro00018003-RA_Chlamydomonas_reinhardtii_predicted_protein_[CHLREDRAFT_118990]_mRNA,_partial_cds	357.9	8.48341	0.0627	down
Cpro00025933-RA_Micromonas_sp._RCC299_chromosome_11_predicted_protein_[MICPUN_107152]_mRNA,_complete_cds	351.369	8.45684	0.0627	down
Cpro00013396-RA_Ramlibacter_tataouinensis_TTB310,_complete_genome	345.609	8.433	0.0627	down
Cpro00013186-RA_Chlorella_variabilis_hypothetical_protein_[CHLNCDRAFT_25686]_mRNA,_complete_cds	341.078	8.41396	0.0627	down
Cpro00020165-RA_Coccomyxa_subellipsoidea_C-169_hypothetical_protein_[COCSUDRAFT_14707]_mRNA,_complete_cds	339.578	8.4076	0.0627	down
Cpro00005560-RA_Candidatus_Chloracidobacterium_thermophilum_B_chromosome_1,_complete_sequence	333.974	8.38359	0.0627	down
Cpro00009885-RA_Auxenochlorella_protothecoides_strain_0710_NADPH-dependent_FMN_reductase_mRNA,_partial_cds	289.21	8.17597	0.0627	down
Cpro00010257-RA_Chlorella_variabilis_hypothetical_protein_[CHLNCDRAFT_8428]_mRNA,_partial_cds	165.678	7.37224	0.0627	down
Cpro00003072-RA_Auxenochlorella_protothecoides_strain_0710_50S_ribosomal_protein_L3_mRNA,_partial_cds	139.782	7.12703	0.0627	down
Cpro00015865-RA_Micromonas_pusilla_CCMP1545_predicted_protein,_mRNA	128.684	7.00769	0.0627	down
Cpro00007215-RA_Auxenochlorella_protothecoides_actin_gene,_complete_cds	121.55	6.92541	0.0627	down
Cpro00020914-RA_Chondrus_crispus_unnamed_protein_product_[CHC_T00005636001]_mRNA,_complete_cds	113.094	6.82138	0.0627	down
Cpro00019789-RA_Chlorella_variabilis_hypothetical_protein_[CHLNCDRAFT_136969]_mRNA,_complete_cds	104.815	6.7117	0.0627	down
Cpro00014135-RA_Chlamydomonas_reinhardtii_aspartate_aminotransferase_[AST2]_mRNA,_complete_cds	98.032	6.61518	0.0627	down
Cpro00006750-RA_PREDICTED,_Ochotona_princeps_ATP-binding_cassette,_sub-family_C_[CFTR/MRP],_member_1_[ABCC1],_mRNA	93.012	6.53934	0.0627	down
Cpro00014179-RA_Prototheca_wickerhamii_plastid_enoyl-	88.256	6.46362	0.0627	down
Cpro00024017-RA_Volvox_carteri_f._nagariensis_hypothetical_protein,_mRNA	86.67	6.43746	0.0627	down
Cpro00022218-RA_Chlorella_variabilis_hypothetical_protein_[CHLNCDRAFT_35091]_mRNA,_complete_cds	84.292	6.39732	0.0627	down
Cpro00020942-RA_Coccomyxa_subellipsoidea_C-169_chloroplast_ferredoxin_[COCSUDRAFT_25236]_mRNA,_complete_cds	75.11	6.23093	0.0627	down
Cpro00012173-RA_Chlorella_variabilis_hypothetical_protein_[CHLNCDRAFT_49066]_mRNA,_complete_cds	71.08	6.15137	0.0627	down
Cpro00004987-RA_Coccomyxa_subellipsoidea_C-169_ATP-binding_cassette_transporter_[COCSUDRAFT_53156]_mRNA,_complete_cds	60.378	5.91595	0.0627	down
Cpro00014133-RA_Auxenochlorella_protothecoides_strain_0710_glycine_rich_protein_mRNA,_complete_cds	56.811	5.8281	0.0627	down
Cpro00021457-RA_Coccomyxa_subellipsoidea_C-169_RCC1/BLIP-II_[COCSUDRAFT_46591]_mRNA,_complete_cds	54.961	5.78034	0.0627	down
Cpro00012781-RA_Auxenochlorella_protothecoides_strain_0710_glucan_synthase_mRNA,_complete_cds	54.433	5.76641	0.0627	down
Cpro00014516-RA_Wolffia_australiana_clone_18AK2.10_putative_chlorophyll_a/b_binding_protein_mRNA,_complete_cds	48.355	5.59559	0.0627	down
Cpro00024816-RA_Chlorella_variabilis_hypothetical_protein_[CHLNCDRAFT_32696]_mRNA,_complete_cds	46.638	5.54343	0.0627	down
Cpro00014715-RA_Chlamydomonas_reinhardtii_predicted_protein_[CHLREDRAFT_113915]_mRNA,_partial_cds	44.524	5.47651	0.0627	down
Cpro00021829-RA_Chlorella_variabilis_hypothetical_protein_[CHLNCDRAFT_138663]_mRNA,_complete_cds	42.806	5.41974	0.0627	down
Cpro00015562-RA_Micromonas_sp._RCC299_chromosome_2_glycosyltransferase_family_5_protein_[GBSSI]_mRNA,_complete_cds	42.542	5.41082	0.0627	down
Cpro00014643-RA_Chlorella_variabilis_hypothetical_protein_[CHLNCDRAFT_134999]_mRNA,_complete_cds	41.353	5.36992	0.0627	down
Cpro00017028-RA_Aeromonas_hydrophila_4AK4,_complete_genome	40.692	5.34667	0.0627	down
Cpro00003315-RA_Chlamydomonas_reinhardtii_membrane_AAA-metalloprotease_[FTSH1]_mRNA,_complete_cds	39.107	5.28935	0.0627	down
Cpro00024402-RA_Zea_mays_clone_239853_ras-related_protein_ARA-3_mRNA,_complete_cds	38.711	5.27467	0.0627	down
Cpro00016928-RA_Micromonas_pusilla_CCMP1545_predicted_protein,_mRNA	36.729	5.19885	0.0627	down
Cpro00016616-RA_Uncultured_rumen_bacterium_clone_d2silb02_formyltetrathydrofolate_synthetase_[FTHFS]_gene,_partial_cds	35.143	5.13517	0.0627	down
Cpro00021973-RA_Chlorella_variabilis_hypothetical_protein_[CHLNCDRAFT_22004]_mRNA,_complete_cds	33.47	5.0648	0.0627	down
Cpro00010955-RA_Chlamydomonas_reinhardtii_strain_CC-503_cw92_mt+	33.294	5.05719	0.0627	down
Cpro00014016-RA_Oligotropha_carboxidovorans_OM5,_complete_genome	33.294	5.05719	0.0627	down
Cpro00013121-RA_Micromonas_sp._RCC299_chromosome_2_carbohydrate-binding_module_family_48_protein_[MICPUN_55897]_mRNA,_complete_cds	32.501	5.02241	0.0627	down
Cpro00005555-RA_Chlorella_variabilis_hypothetical_protein_[CHLNCDRAFT_33052]_mRNA,_complete_cds	31.18	4.96255	0.0627	down
Cpro00001452-RA_Chlamydomonas_reinhardtii_glutathione_reductase_[GSHR1]_mRNA,_complete_cds	31.048	4.95643	0.0627	down
Cpro00010326-RA_Coccomyxa_subellipsoidea_C-169_putative_CMP-sialic_acid_transporter_[COCSUDRAFT_57991]_mRNA,_complete_cds	30.651	4.93786	0.0627	down
Cpro00018521-RA_Chlamydomonas_reinhardtii_strain_CC-503_cw92_mt+	30.651	4.93786	0.0627	down
Cpro00008602-RA_Chlorella_variabilis_hypothetical_protein_[CHLNCDRAFT_133936]_mRNA,_complete_cds	30.387	4.92538	0.0627	down
Cpro00004613-RA_Auxenochlorella_protothecoides_strain_0710_ATP-binding_cassette_transporter_mRNA,_complete_cds	29.594	4.88723	0.0627	down
Cpro00003279-RA_Chlamydomonas_reinhardtii_strain_CC-503_cw92_mt+	27.084	4.75937	0.0627	down
Cpro00025067-RA_Gloeophyllum_trabeum_ATCC_11539_Clavaminate_synthase-like_protein_partial_mRNA	26.423	4.72372	0.0627	down
Cpro00016267-RA_PREDICTED,_Sorex_araneus_E2F_transcription_factor_7_[E2F7],_mRNA	26.423	4.72372	0.0627	down
Cpro00015751-RA_Chlorella_variabilis_argininosuccinate_lyase_[CHLNCDRAFT_26929]_mRNA,_complete_cds	26.159	4.70924	0.0627	down
Cpro00019297-RA_Chlorella_variabilis_hypothetical_protein_[CHLNCDRAFT_25546]_mRNA,_complete_cds	25.102	4.64973	0.0627	down
Cpro00022517-RA_Chlorella_variabilis_hypothetical_protein_[CHLNCDRAFT_25204]_mRNA,_partial_cds	25.102	4.64973	0.0627	down
Cpro00015443-RA_Chlorella_variabilis_hypothetical_protein_[CHLNCDRAFT_59799]_mRNA,_complete_cds	24.045	4.58767	0.0627	down
Cpro00024952-RA_Chlorella_variabilis_hypothetical_protein_[CHLNCDRAFT_33763]_mRNA,_complete_cds	24.045	4.58767	0.0627	down
Cpro00009147-RA_Chlorella_variabilis_hypothetical_protein_[CHLNCDRAFT_48446]_mRNA,_complete_cds	23.253	4.53934	0.0627	down
Cpro00026200-RA_Saccharothrix_espanaensis_DSM_44229_complete_genome	22.988	4.52281	0.0627	down
Cpro00004583-RA_Chlorella_variabilis_hypothetical_protein_[CHLNCDRAFT_18787]_mRNA,_complete_cds	22.196	4.47223	0.0627	down
Cpro00022456-RA_Coccomyxa_subellipsoidea_C-169_DAO-domain-containing_protein_[COCSUDRAFT_27656]_mRNA,_complete_cds	22.143	4.46878	0.0627	down
Cpro00013433-RA_Chlorella_variabilis_hypothetical_protein_[CHLNCDRAFT_56016]_mRNA,_complete_cds	22.12	4.46728	0.0627	down
Cpro00024756-RA_Prototheca_wickerhamii_strain_SAG_263-11_plastid_transaldolase_1_mRNA,_partial_cds; _nuclear_gene_for_plastid_product	22.064	4.46362	0.0627	down
Cpro00008811-RA_Chlorella_variabilis_hypothetical_protein_[CHLNCDRAFT_34065]_mRNA,_complete_cds	21.799	4.44619	0.0627	down
Cpro00010203-RA_Micromonas_pusilla_CCMP1545_predicted_protein,_mRNA	20.61	4.36527	0.0627	down
Cpro00022942-RA_Volvox_carteri_f._nagariensis_hypothetical_protein,_mRNA	20.478	4.356	0.0627	down
Cpro00015956-RA_Chlorella_variabilis_hypothetical_protein_[CHLNCDRAFT_28318]_mRNA,_partial_cds	20.164	4.33371	0.0627	down
Cpro00012280-RA_Chlamydomonas_reinhardtii_strain_CC-503_cw92_mt+	20.082	4.32783	0.0627	down
Cpro00004420-RA_Ostreococcus_lucimarinus_CCE9901_predicted_protein_[OSTLU_36933]_mRNA,_complete_cds	19.289	4.26971	0.0627	down
Cpro00018426-RA_Drosophila_mojavensis_GI18787_[Dmoj\GI18787],_mRNA	19.289	4.26971	0.0627	down
Cpro00021940-RA_Auxenochlorella_protothecoides_strain_0710_26S_proteasome_regulatory_complex_mRNA,_partial_cds	19.025	4.24982	0.0627	down
Cpro00004616-RA_Auxenochlorella_protothecoides_strain_0710_ATP-binding_cassette_transporter_mRNA,_complete_cds	18.893	4.23978	0.0627	down
Cpro00004827-RA_Coccomyxa_subellipsoidea_C-169_sterol_delta-7_reductase_DWF5_[COCSUDRAFT_40065]_mRNA,_complete_cds	18.761	4.22966	0.0627	down
Cpro00013347-RA_Ixodes_scapularis_diacylglycerol_kinase,_putative,_mRNA	18.628	4.2194	0.0627	down
Cpro00024570-RA_Chlorella_variabilis_hypothetical_protein_[CHLNCDRAFT_28672]_mRNA,_partial_cds	18.496	4.20914	0.0627	down
Cpro00019221-RA_Chlamydomonas_reinhardtii_strain_CC-503_cw92_mt+	18.126	4.17999	0.0627	down
Cpro00014004-RA_Auxenochlorella_protothecoides_strain_0710_malate_dehydrogenase_mRNA,_partial_cds	17.263	4.10961	0.0627	down
Cpro00022900-RA_Azoarcus_aromaticum_EbN1_complete_genome	16.911	4.07989	0.0627	down
Cpro00026939-RA_Chlamydomonas_reinhardtii_strain_CC-503_cw92_mt+	16.647	4.05719	0.0627	down
Cpro00006576-RA_Chlorella_variabilis_hypothetical_protein_[CHLNCDRAFT_133757]_mRNA,_complete_cds	14.797	3.88723	0.0627	down
Cpro00012974-RA_Micromonas_sp._RCC299_chromosome_10_voltage-gated_ion_channel_superfamily_[CAV1]_mRNA,_complete_cds	14.533	3.86126	0.0627	down
Cpro00015718-RA_Opitutaceae_bacterium_TAV5,_complete_genome	14.533	3.86126	0.0627	down
Cpro00021019-RA_Micromonas_sp._RCC299_chromosome_7_predicted_protein_[MICPUN_60277]_mRNA,_complete_cds	14.268	3.83471	0.0627	down
Cpro00024359-RA_Anaeromyxobacter_sp._Fw109-5,_complete_genome	13.608	3.76638	0.0627	down
Cpro00013951-RA_Chlorella_variabilis_hypothetical_protein_[CHLNCDRAFT_133102]_mRNA,_complete_cds	13.3	3.73335	0.0627	down
Cpro00008686-RA_Micromonas_sp._RCC299_chromosome_4_magnesium-chelatase_subunit_chlh-like_protein_chloroplast_precursor_[CHLH2]_mRNA,_complete_cds; _nuclear_gene_for_chloroplast_product	13.211	3.72367	0.0627	down
Cpro00011152-RA_Coccomyxa_subellipsoidea_C-169_PCI-domain-containing_protein_[COCSUDRAFT_27196]_mRNA,_complete_cds	13.211	3.72367	0.0627	down
Cpro00001913-RA_Guillardia_theta_CCMP2712_hypothetical_protein_[GUITHDRAFT_63717]_mRNA,_complete_cds	13.211	3.72367	0.0627	down
Cpro00024615-RA_Deinococcus_radiodurans_R1_chromosome_1,_complete_sequence	13.211	3.72367	0.0627	down
Cpro00023937-RA_Culex_quinquefasciatus_conserved_hypothetical_protein,_mRNA	11.89	3.57168	0.0627	down
Cpro00004487-RA_Chlamydomonas_reinhardtii_strain_CC-503_cw92_mt+	11.802	3.56096	0.0627	down
Cpro00000088-RA_Rhodospirillum_centenum_SW,_complete_genome	11.714	3.55016	0.0627	down
Cpro00012321-RA_Zea_mays_RNA-binding_motif_protein,_X-linked_2_[LOC100282627],_mRNA	11.626	3.53928	0.0627	down
Cpro00006113-RA_Setosphaeria_turcica_Et28A_hypothetical_protein_partial_mRNA	11.23	3.48929	0.0627	down
Cpro00003642-RA_Chlorella_variabilis_hypothetical_protein_[CHLNCDRAFT_56489]_mRNA,_complete_cds	11.098	3.47223	0.0627	down
Cpro00017335-RA_Coccomyxa_subellipsoidea_C-169_AAA-domain-containing_protein_[COCSUDRAFT_20260]_mRNA,_complete_cds	10.833	3.43736	0.0627	down
Cpro00026657-RA_Chlorella_variabilis_hypothetical_protein_[CHLNCDRAFT_56509]_mRNA,_complete_cds	10.728	3.42331	0.0627	down
Cpro00025389-RA_Chlamydomonas_reinhardtii_1-hydroxy-2-methyl-2-[E]-butenyl_4-diphosphate_synthase_[HDS1]_mRNA,_complete_cds	9.776	3.28924	0.0627	down
Cpro00004958-RA_Chlorella_variabilis_hypothetical_protein_[CHLNCDRAFT_137967]_mRNA,_complete_cds	9.776	3.28924	0.0627	down
Cpro00008238-RA_Coccomyxa_subellipsoidea_C-169_cell_division_protein_FtsZ_[COCSUDRAFT_53327]_mRNA,_complete_cds	9.688	3.2762	0.0627	down
Cpro00004514-RA_PREDICTED,_Anolis_carolinensis_dihydrolipoamide_S-acetyltransferase_[dlat],_mRNA	9.6	3.26303	0.0627	down
Cpro00007627-RA_Chlorella_variabilis_hypothetical_protein_[CHLNCDRAFT_48551]_mRNA,_complete_cds	8.984	3.16736	0.0627	down
Cpro00020274-RA_Thielavia_terrestris_NRRL_8126_hypothetical_protein_[THITE_2115636]_mRNA,_complete_cds	8.918	3.15672	0.0627	down
Cpro00013511-RA_Coccomyxa_subellipsoidea_C-169_hypothetical_protein_[COCSUDRAFT_17568]_mRNA,_complete_cds	8.852	3.146	0.0627	down
Cpro00024008-RA_PYU90208Porphyra_yezoensis_RNA_polymerase_II_largest_subunit_[rpb1]_mRNA,_partial_cds	8.719	3.12416	0.0627	down
Cpro00020669-RA_Chlorella_variabilis_hypothetical_protein_[CHLNCDRAFT_56318]_mRNA,_complete_cds	8.631	3.10953	0.0627	down
Cpro00007279-RA_Chlorella_variabilis_hypothetical_protein_[CHLNCDRAFT_33566]_mRNA,_complete_cds	7.662	2.93772	0.0627	down
Cpro00007191-RA_Chlorella_variabilis_hypothetical_protein_[CHLNCDRAFT_7738]_mRNA,_partial_cds	7.398	2.88714	0.0627	down
Cpro00017771-RA_Chlorella_variabilis_hypothetical_protein_[CHLNCDRAFT_138066]_mRNA,_complete_cds	7.134	2.83471	0.0627	down
Cpro00009582-RA_Streptomyces_coelicolor_A3[2]_complete_genome, _segment_7/29	6.429	2.68459	0.0627	down
Cpro00020465-RA_Laribacter_hongkongensis_HLHK9,_complete_genome	6.429	2.68459	0.0627	down
Cpro00027089-RA_Chlorella_variabilis_hypothetical_protein_[CHLNCDRAFT_138627]_mRNA,_complete_cds	6.341	2.66471	0.0627	down
Cpro00017395-RA_Pseudozyma_flocculosa_PF-1_hypothetical_protein_partial_mRNA	6.209	2.63436	0.0627	down
Cpro00021766-RA_Chlamydomonas_reinhardtii_strain_CC-503_cw92_mt+	6.197	2.63157	0.0627	down
Cpro00014690-RA_PREDICTED,_Panthera_tigris_altaica_ADP-ribosylation_factor_related_protein_1_[ARFRP1],_mRNA	6.183	2.62831	0.0627	down
Cpro00023141-RA_Chlorella_variabilis_hypothetical_protein_[CHLNCDRAFT_145535]_mRNA,_complete_cds	5.681	2.50614	0.0627	down
Cpro00019029-RA_Coccomyxa_subellipsoidea_C-169_T-complex_protein_1_[COCSUDRAFT_28069]_mRNA,_complete_cds	5.02	2.32769	0.0627	down
Cpro00011201-RA_Chlorella_variabilis_hypothetical_protein_[CHLNCDRAFT_140361]_mRNA,_complete_cds	4.227	2.07963	0.0627	down
Cpro00008995-RA_Chlorella_variabilis_hypothetical_protein_[CHLNCDRAFT_29960]_mRNA,_complete_cds	4.016	2.00576	0.0627	down
Cpro00007487-RA_Chlorella_protothecoides_partial_mRNA_for_putative_extensin-like_protein_[dee189_gene]	3.567	1.83471	0.0627	down
Cpro00021178-RA_Coccomyxa_subellipsoidea_C-169_RNA_polymerase_II_second_largest_subunit_[COCSUDRAFT_54821]_mRNA,_complete_cds	3.51	1.81147	0.0627	down
Cpro00021776-RA_PREDICTED,_Setaria_italica_probable_protein_phosphatase_2C_37-like_[LOC101780602],_mRNA	3.376	1.75531	0.0627	down
Cpro00001773-RA_Coccomyxa_subellipsoidea_C-169_26S_proteasome_AAA-ATPase_subunit_RPT6a_[COCSUDRAFT_67523]_mRNA,_complete_cds	2.985	1.57773	0.0627	down
Cpro00018694-RA_Chlorella_variabilis_hypothetical_protein_[CHLNCDRAFT_29709]_mRNA,_complete_cds	2.818	1.49467	0.0627	down
Cpro00024910-RA_Chlamydomonas_reinhardtii_strain_CC-503_cw92_mt+	2.818	1.49467	0.0627	down
Cpro00000828-RA_Schizophyllum_commune_H4-8_hypothetical_protein,_mRNA	2.708	1.43723	0.0627	down
Cpro00013040-RA_Chlorella_variabilis_V-type_H+_ATPase_subunit_A_[CHLNCDRAFT_56410]_mRNA,_complete_cds	2.618	1.38847	0.0627	down
Cpro00000023-RA_Prototheca_wickerhamii_plastid_glutamate-cysteine_ligase-like_mRNA,_partial_sequence	2.459	1.29807	0.0627	down
Cpro00022859-RA_Endocarpon_pusillum_Z07020_Serine/threonine-protein_phosphatase_T_mRNA	2.415	1.27202	0.0627	down
Cpro00026291-RA_Chlorella_variabilis_hypothetical_protein_[CHLNCDRAFT_55283]_mRNA,_complete_cds	2.378	1.24975	0.0627	down
Cpro00007218-RA_Auxenochlorella_protothecoides_actin_gene,_complete_cds	2.246	1.16736	0.0627	down
Cpro00015903-RA_Endocarpon_pusillum_Z07020_hypothetical_protein_mRNA	2.246	1.16736	0.0627	down
Cpro00020319-RA_Chlamydomonas_reinhardtii_uncoupling_protein_[UCP1]_mRNA,_complete_cds	1.981	0.986229	0.0627	down
Cpro00007317-RA_Chlorella_variabilis_hypothetical_protein_[CHLNCDRAFT_28187]_mRNA,_complete_cds	1.915	0.937344	0.0627	down
Cpro00000307-RA	22920.1	14.4843	0.0627	down
Cpro00019787-RA	22443.7	14.454	0.0627	down
Cpro00017361-RA	19068.9	14.2189	0.0627	down
Cpro00025251-RA	18867.5	14.2036	0.0627	down
Cpro00010432-RA	15853	13.9525	0.0627	down
Cpro00014039-RA	15789.9	13.9467	0.0627	down
Cpro00006471-RA	14846.9	13.8579	0.0627	down
Cpro00013982-RA	14584.4	13.8321	0.0627	down
Cpro00008969-RA	14558.2	13.8295	0.0627	down
Cpro00008299-RA	14314.8	13.8052	0.0627	down
Cpro00011920-RA	13749.2	13.7471	0.0627	down
Cpro00018980-RA	12948.8	13.6605	0.0627	down
Cpro00020387-RA	12227.6	13.5779	0.0627	down
Cpro00011308-RA	12102.7	13.563	0.0627	down
Cpro00004557-RA	11187	13.4495	0.0627	down
Cpro00008532-RA	10797.6	13.3984	0.0627	down
Cpro00025808-RA	10694.5	13.3846	0.0627	down
Cpro00002730-RA	10558.8	13.3662	0.0627	down
Cpro00009884-RA	10160.1	13.3106	0.0627	down
Cpro00015381-RA	10080	13.2992	0.0627	down
Cpro00008938-RA	9788.73	13.2569	0.0627	down
Cpro00019593-RA	9590.31	13.2274	0.0627	down
Cpro00013087-RA	9429.15	13.2029	0.0627	down
Cpro00000594-RA	8579.26	13.0666	0.0627	down
Cpro00026888-RA	8503.72	13.0539	0.0627	down
Cpro00017633-RA	8462.76	13.0469	0.0627	down
Cpro00022236-RA_	8286.84	13.0166	0.0627	down
Cpro00011132-RA	8194.19	13.0004	0.0627	down
Cpro00022219-RA	8132.32	12.9895	0.0627	down
Cpro00015997-RA	8102.16	12.9841	0.0627	down
Cpro00018494-RA	8039.93	12.973	0.0627	down
Cpro00010700-RA	8015.39	12.9686	0.0627	down
Cpro00023451-RA	8012.42	12.968	0.0627	down
Cpro00006879-RA	7870.67	12.9423	0.0627	down
Cpro00015605-RA	7784.18	12.9263	0.0627	down
Cpro00020206-RA	7770.11	12.9237	0.0627	down
Cpro00016605-RA	7766.35	12.923	0.0627	down
Cpro00022245-RA	7753.29	12.9206	0.0627	down
Cpro00021808-RA	7750.2	12.92	0.0627	down
Cpro00017881-RA	7736.34	12.9174	0.0627	down
Cpro00024798-RA	7718.97	12.9142	0.0627	down
Cpro00012983-RA	7693.14	12.9094	0.0627	down
Cpro00009761-RA	7548.77	12.882	0.0627	down
Cpro00002910-RA	7545.19	12.8813	0.0627	down
Cpro00005876-RA	7544.24	12.8812	0.0627	down
Cpro00008988-RA	7530.26	12.8785	0.0627	down
Cpro00016840-RA	7512.91	12.8752	0.0627	down
Cpro00015689-RA	7470.55	12.867	0.0627	down
Cpro00024390-RA	7462.41	12.8654	0.0627	down
Cpro00010819-RA	7430.94	12.8593	0.0627	down
Cpro00018874-RA	7404.46	12.8542	0.0627	down
Cpro00013076-RA	7402.6	12.8538	0.0627	down
Cpro00010838-RA	7341.55	12.8419	0.0627	down
Cpro00015403-RA	7308.48	12.8354	0.0627	down
Cpro00015955-RA	7292.18	12.8321	0.0627	down
Cpro00001850-RA	7258.13	12.8254	0.0627	down
Cpro00012460-RA	7223.85	12.8186	0.0627	down
Cpro00025772-RA	7220.29	12.8178	0.0627	down
Cpro00018255-RA	7200.36	12.8139	0.0627	down
Cpro00012093-RA	7158.12	12.8054	0.0627	down
Cpro00012990-RA	7133.68	12.8004	0.0627	down
Cpro00012393-RA	7124.79	12.7986	0.0627	down
Cpro00000624-RA	7088.49	12.7913	0.0627	down
Cpro00019340-RA	7066.97	12.7869	0.0627	down
Cpro00021595-RA	7054.94	12.7844	0.0627	down
Cpro00010183-RA	6982.05	12.7694	0.0627	down
Cpro00021355-RA	6929.78	12.7586	0.0627	down
Cpro00019864-RA	6919.27	12.7564	0.0627	down
Cpro00013274-RA	6899.61	12.7523	0.0627	down
Cpro00012436-RA	6740.55	12.7187	0.0627	down
Cpro00010826-RA	6735.93	12.7177	0.0627	down
Cpro00017902-RA	6725.59	12.7154	0.0627	down
Cpro00025232-RA	6636.97	12.6963	0.0627	down
Cpro00025486-RA	6566.04	12.6808	0.0627	down
Cpro00025105-RA	6562.49	12.68	0.0627	down
Cpro00004556-RA	6558.89	12.6792	0.0627	down
Cpro00021613-RA	6472.93	12.6602	0.0627	down
Cpro00026541-RA	6461.54	12.6577	0.0627	down
Cpro00005359-RA	6452.97	12.6557	0.0627	down
Cpro00012522-RA	6429.01	12.6504	0.0627	down
Cpro00016608-RA	6425.04	12.6495	0.0627	down
Cpro00011180-RA	6405.73	12.6451	0.0627	down
Cpro00016204-RA	6388.53	12.6413	0.0627	down
Cpro00024018-RA	6369.77	12.637	0.0627	down
Cpro00021701-RA	6318.43	12.6253	0.0627	down
Cpro00017907-RA	6279.01	12.6163	0.0627	down
Cpro00007517-RA	6278.48	12.6162	0.0627	down
Cpro00008412-RA	6239.7	12.6073	0.0627	down
Cpro00014376-RA	6222.3	12.6032	0.0627	down
Cpro00010724-RA	6203.48	12.5989	0.0627	down
Cpro00009881-RA	6154.51	12.5874	0.0627	down
Cpro00020351-RA	6083.25	12.5706	0.0627	down
Cpro00006799-RA	6006.01	12.5522	0.0627	down
Cpro00010969-RA	5970.98	12.5438	0.0627	down
Cpro00016674-RA	5948.04	12.5382	0.0627	down
Cpro00003467-RA	5933.5	12.5347	0.0627	down
Cpro00022773-RA	5913.95	12.5299	0.0627	down
Cpro00016859-RA	5859.45	12.5166	0.0627	down
Cpro00013252-RA	5845	12.513	0.0627	down
Cpro00002046-RA	5822.69	12.5075	0.0627	down
Cpro00000091-RA	5719.96	12.4818	0.0627	down
Cpro00000312-RA	5716.66	12.481	0.0627	down
Cpro00000265-RA	5715.6	12.4807	0.0627	down
Cpro00017745-RA	5697.88	12.4762	0.0627	down
Cpro00024885-RA	5679.86	12.4716	0.0627	down
Cpro00006670-RA	5660.15	12.4666	0.0627	down
Cpro00008598-RA	5621.91	12.4568	0.0627	down
Cpro00003117-RA	5606.88	12.453	0.0627	down
Cpro00006837-RA	5572.3	12.4441	0.0627	down
Cpro00025912-RA	5560.13	12.4409	0.0627	down
Cpro00000310-RA	5555.57	12.4397	0.0627	down
Cpro00015556-RA	5443.18	12.4102	0.0627	down
Cpro00010986-RA	5441.72	12.4098	0.0627	down
Cpro00013423-RA	5412.83	12.4022	0.0627	down
Cpro00019701-RA	5408.95	12.4011	0.0627	down
Cpro00026949-RA	5380.97	12.3937	0.0627	down
Cpro00011075-RA	5369.24	12.3905	0.0627	down
Cpro00006876-RA	5314.46	12.3757	0.0627	down
Cpro00008439-RA	5313.39	12.3754	0.0627	down
Cpro00017195-RA	5292.35	12.3697	0.0627	down
Cpro00023707-RA	5254.32	12.3593	0.0627	down
Cpro00024799-RA	5253.26	12.359	0.0627	down
Cpro00007490-RA	5243.2	12.3562	0.0627	down
Cpro00026266-RA	5211.07	12.3474	0.0627	down
Cpro00010427-RA	5151.63	12.3308	0.0627	down
Cpro00025667-RA	5129.48	12.3246	0.0627	down
Cpro00024005-RA	5113.03	12.32	0.0627	down
Cpro00001958-RA	5098.94	12.316	0.0627	down
Cpro00014968-RA	5087.59	12.3128	0.0627	down
Cpro00022932-RA	5086.49	12.3125	0.0627	down
Cpro00016620-RA	5084.98	12.312	0.0627	down
Cpro00008024-RA	5084.16	12.3118	0.0627	down
Cpro00002486-RA	5082.43	12.3113	0.0627	down
Cpro00019711-RA	5077.38	12.3099	0.0627	down
Cpro00016662-RA	5067.63	12.3071	0.0627	down
Cpro00025811-RA	5044.75	12.3006	0.0627	down
Cpro00009169-RA	5021.27	12.2938	0.0627	down
Cpro00015053-RA	5015.62	12.2922	0.0627	down
Cpro00001626-RA	4999.72	12.2876	0.0627	down
Cpro00013066-RA	4978.11	12.2814	0.0627	down
Cpro00000663-RA	4954.31	12.2745	0.0627	down
Cpro00024747-RA	4933.51	12.2684	0.0627	down
Cpro00000216-RA	4919.17	12.2642	0.0627	down
Cpro00009348-RA	4908.01	12.2609	0.0627	down
Cpro00008304-RA	4888.61	12.2552	0.0627	down
Cpro00002613-RA	4885.06	12.2542	0.0627	down
Cpro00026135-RA	4867.29	12.2489	0.0627	down
Cpro00008773-RA	4862.35	12.2474	0.0627	down
Cpro00024148-RA	4853.7	12.2449	0.0627	down
Cpro00004200-RA	4853.44	12.2448	0.0627	down
Cpro00024624-RA	4833.99	12.239	0.0627	down
Cpro00025027-RA	4818.78	12.2345	0.0627	down
Cpro00016525-RA	4813.76	12.2329	0.0627	down
Cpro00004524-RA	4812.69	12.2326	0.0627	down
Cpro00017696-RA	4792.44	12.2265	0.0627	down
Cpro00014861-RA	4790.84	12.2261	0.0627	down
Cpro00010519-RA	4778.62	12.2224	0.0627	down
Cpro00026099-RA	4770.1	12.2198	0.0627	down
Cpro00022028-RA	4764.33	12.2181	0.0627	down
Cpro00024666-RA	4757	12.2158	0.0627	down
Cpro00015205-RA	4749.54	12.2136	0.0627	down
Cpro00016664-RA	4725.91	12.2064	0.0627	down
Cpro00012332-RA	4717.23	12.2037	0.0627	down
Cpro00003319-RA	4703.2	12.1994	0.0627	down
Cpro00015549-RA	4677.6	12.1916	0.0627	down
Cpro00008409-RA	4671.14	12.1896	0.0627	down
Cpro00007308-RA	4660.26	12.1862	0.0627	down
Cpro00020143-RA	4659.6	12.186	0.0627	down
Cpro00016848-RA	4647.81	12.1823	0.0627	down
Cpro00002597-RA	4643.09	12.1809	0.0627	down
Cpro00014639-RA	4577.84	12.1605	0.0627	down
Cpro00001543-RA	4572.03	12.1586	0.0627	down
Cpro00001557-RA	4544.37	12.1499	0.0627	down
Cpro00005355-RA	4527.11	12.1444	0.0627	down
Cpro00015463-RA	4523.21	12.1431	0.0627	down
Cpro00006768-RA	4505.23	12.1374	0.0627	down
Cpro00020814-RA	4488.46	12.132	0.0627	down
Cpro00026620-RA	4473.35	12.1271	0.0627	down
Cpro00013403-RA	4466.29	12.1249	0.0627	down
Cpro00025072-RA	4430.82	12.1134	0.0627	down
Cpro00023519-RA	4425.76	12.1117	0.0627	down
Cpro00004797-RA	4410.29	12.1067	0.0627	down
Cpro00008943-RA	4380.71	12.0969	0.0627	down
Cpro00025047-RA	4378.12	12.0961	0.0627	down
Cpro00023444-RA	4367.02	12.0924	0.0627	down
Cpro00017754-RA	4351.05	12.0871	0.0627	down
Cpro00003507-RA	4346.99	12.0858	0.0627	down
Cpro00000306-RA	4341.8	12.0841	0.0627	down
Cpro00013591-RA	4335.2	12.0819	0.0627	down
Cpro00013298-RA	4314.49	12.075	0.0627	down
Cpro00015269-RA	4310.13	12.0735	0.0627	down
Cpro00026393-RA	4292.7	12.0677	0.0627	down
Cpro00025209-RA	4285.55	12.0653	0.0627	down
Cpro00001618-RA	4280.9	12.0637	0.0627	down
Cpro00022649-RA	4279.6	12.0633	0.0627	down
Cpro00026959-RA	4275.48	12.0619	0.0627	down
Cpro00021473-RA	4274.86	12.0617	0.0627	down
Cpro00020627-RA	4261.05	12.057	0.0627	down
Cpro00005068-RA	4253.42	12.0544	0.0627	down
Cpro00005685-RA	4243.99	12.0512	0.0627	down
Cpro00026125-RA	4241.09	12.0502	0.0627	down
Cpro00024569-RA	4238.05	12.0492	0.0627	down
Cpro00014097-RA	4232.05	12.0471	0.0627	down
Cpro00019142-RA	4227.32	12.0455	0.0627	down
Cpro00006098-RA	4209.64	12.0395	0.0627	down
Cpro00008226-RA	4196.06	12.0348	0.0627	down
Cpro00023494-RA	4178.7	12.0288	0.0627	down
Cpro00015545-RA	4177.39	12.0284	0.0627	down
Cpro00020674-RA	4166.68	12.0247	0.0627	down
Cpro00015475-RA	4164.38	12.0239	0.0627	down
Cpro00004462-RA	4143.73	12.0167	0.0627	down
Cpro00002137-RA	4140.87	12.0157	0.0627	down
Cpro00022734-RA	4114.04	12.0063	0.0627	down
Cpro00007771-RA	4088.66	11.9974	0.0627	down
Cpro00022823-RA	4083.84	11.9957	0.0627	down
Cpro00017281-RA	4075.05	11.9926	0.0627	down
Cpro00005100-RA	4069	11.9905	0.0627	down
Cpro00026333-RA	4040.74	11.9804	0.0627	down
Cpro00019034-RA	4034.24	11.9781	0.0627	down
Cpro00010676-RA	4015.65	11.9714	0.0627	down
Cpro00024108-RA	4009.42	11.9692	0.0627	down
Cpro00016611-RA	3999.09	11.9655	0.0627	down
Cpro00004068-RA	3998.68	11.9653	0.0627	down
Cpro00021730-RA	3997.08	11.9647	0.0627	down
Cpro00008447-RA	3988.51	11.9616	0.0627	down
Cpro00016955-RA	3979.55	11.9584	0.0627	down
Cpro00010360-RA	3947.97	11.9469	0.0627	down
Cpro00019274-RA	3942.19	11.9448	0.0627	down
Cpro00019703-RA	3941.13	11.9444	0.0627	down
Cpro00003107-RA	3935.33	11.9423	0.0627	down
Cpro00008516-RA	3935.33	11.9423	0.0627	down
Cpro00025682-RA	3915.26	11.9349	0.0627	down
Cpro00001494-RA	3902.81	11.9303	0.0627	down
Cpro00021691-RA	3899.06	11.9289	0.0627	down
Cpro00000286-RA	3888.49	11.925	0.0627	down
Cpro00009167-RA	3881.79	11.9225	0.0627	down
Cpro00011613-RA	3863.92	11.9158	0.0627	down
Cpro00008777-RA	3859.11	11.9141	0.0627	down
Cpro00008018-RA	3837.43	11.9059	0.0627	down
Cpro00017756-RA	3837.17	11.9058	0.0627	down
Cpro00021259-RA	3833.12	11.9043	0.0627	down
Cpro00004933-RA	3817.49	11.8984	0.0627	down
Cpro00016292-RA	3814.86	11.8974	0.0627	down
Cpro00013590-RA	3813.59	11.8969	0.0627	down
Cpro00003924-RA	3805.98	11.8941	0.0627	down
Cpro00000627-RA	3794.79	11.8898	0.0627	down
Cpro00015156-RA	3794.02	11.8895	0.0627	down
Cpro00023467-RA	3785.55	11.8863	0.0627	down
Cpro00021267-RA	3782.64	11.8852	0.0627	down
Cpro00020044-RA	3769.98	11.8803	0.0627	down
Cpro00014367-RA	3747.94	11.8719	0.0627	down
Cpro00002038-RA	3747.94	11.8719	0.0627	down
Cpro00008231-RA	3742.29	11.8697	0.0627	down
Cpro00023514-RA	3739.01	11.8684	0.0627	down
Cpro00010823-RA	3733.3	11.8662	0.0627	down
Cpro00018369-RA	3732.19	11.8658	0.0627	down
Cpro00011109-RA	3727.57	11.864	0.0627	down
Cpro00026569-RA	3723.28	11.8624	0.0627	down
Cpro00003320-RA	3717.71	11.8602	0.0627	down
Cpro00017415-RA	3717.12	11.86	0.0627	down
Cpro00016202-RA	3706.75	11.8559	0.0627	down
Cpro00013564-RA	3706.75	11.8559	0.0627	down
Cpro00025674-RA	3702.23	11.8542	0.0627	down
Cpro00004015-RA	3687.31	11.8484	0.0627	down
Cpro00017748-RA	3665.48	11.8398	0.0627	down
Cpro00018613-RA	3656.84	11.8364	0.0627	down
Cpro00015026-RA	3654.24	11.8354	0.0627	down
Cpro00025045-RA	3654.24	11.8354	0.0627	down
Cpro00005497-RA	3650.04	11.8337	0.0627	down
Cpro00012573-RA	3648.83	11.8332	0.0627	down
Cpro00004443-RA_	3645.72	11.832	0.0627	down
Cpro00003102-RA	3639.62	11.8296	0.0627	down
Cpro00012759-RA	3638.84	11.8293	0.0627	down
Cpro00025945-RA	3633.67	11.8272	0.0627	down
Cpro00006003-RA	3632.13	11.8266	0.0627	down
Cpro00014707-RA	3627.04	11.8246	0.0627	down
Cpro00025426-RA	3627.04	11.8246	0.0627	down
Cpro00002483-RA	3614.08	11.8194	0.0627	down
Cpro00001993-RA	3600.96	11.8142	0.0627	down
Cpro00021559-RA	3596.37	11.8123	0.0627	down
Cpro00003961-RA	3594.78	11.8117	0.0627	down
Cpro00017914-RA	3592.87	11.8109	0.0627	down
Cpro00002690-RA	3588.45	11.8091	0.0627	down
Cpro00006097-RA	3580.27	11.8059	0.0627	down
Cpro00000857-RA	3574.8	11.8036	0.0627	down
Cpro00005897-RA	3568.39	11.8011	0.0627	down
Cpro00010827-RA	3551.68	11.7943	0.0627	down
Cpro00025859-RA	3545.84	11.7919	0.0627	down
Cpro00025110-RA	3545.63	11.7918	0.0627	down
Cpro00002134-RA	3544.24	11.7913	0.0627	down
Cpro00018180-RA	3538.26	11.7888	0.0627	down
Cpro00026179-RA	3513.69	11.7788	0.0627	down
Cpro00025143-RA	3502.88	11.7743	0.0627	down
Cpro00006495-RA	3501.64	11.7738	0.0627	down
Cpro00015641-RA	3498.74	11.7726	0.0627	down
Cpro00001933-RA	3494.7	11.771	0.0627	down
Cpro00019505-RA	3493.61	11.7705	0.0627	down
Cpro00000625-RA	3487.01	11.7678	0.0627	down
Cpro00018048-RA	3483.14	11.7662	0.0627	down
Cpro00025123-RA	3480.23	11.765	0.0627	down
Cpro00019060-RA	3477.65	11.7639	0.0627	down
Cpro00004662-RA	3472.35	11.7617	0.0627	down
Cpro00003745-RA	3459.64	11.7564	0.0627	down
Cpro00018589-RA	3443.42	11.7496	0.0627	down
Cpro00003713-RA	3427.99	11.7431	0.0627	down
Cpro00025686-RA	3419.51	11.7396	0.0627	down
Cpro00000535-RA	3418.12	11.739	0.0627	down
Cpro00017243-RA	3394.36	11.7289	0.0627	down
Cpro00005101-RA	3384.62	11.7248	0.0627	down
Cpro00020749-RA	3376.66	11.7214	0.0627	down
Cpro00011774-RA	3373.14	11.7199	0.0627	down
Cpro00022140-RA	3350.91	11.7103	0.0627	down
Cpro00024465-RA	3335.39	11.7036	0.0627	down
Cpro00020011-RA	3335.28	11.7036	0.0627	down
Cpro00007906-RA	3333.92	11.703	0.0627	down
Cpro00010706-RA	3331.5	11.702	0.0627	down
Cpro00003552-RA	3325.94	11.6995	0.0627	down
Cpro00013929-RA	3319.47	11.6967	0.0627	down
Cpro00012571-RA	3317.85	11.696	0.0627	down
Cpro00011567-RA	3310.09	11.6927	0.0627	down
Cpro00022621-RA	3309.67	11.6925	0.0627	down
Cpro00027060-RA	3308.2	11.6918	0.0627	down
Cpro00016075-RA	3307	11.6913	0.0627	down
Cpro00019668-RA	3307	11.6913	0.0627	down
Cpro00000350-RA	3299.81	11.6882	0.0627	down
Cpro00016156-RA	3266.78	11.6737	0.0627	down
Cpro00003595-RA	3257.73	11.6696	0.0627	down
Cpro00021218-RA	3254.12	11.6681	0.0627	down
Cpro00009389-RA	3250.93	11.6666	0.0627	down
Cpro00005961-RA	3249.54	11.666	0.0627	down
Cpro00026418-RA	3245.98	11.6644	0.0627	down
Cpro00020326-RA	3245.37	11.6642	0.0627	down
Cpro00003797-RA	3243.41	11.6633	0.0627	down
Cpro00018922-RA	3235.86	11.6599	0.0627	down
Cpro00002190-RA	3235.86	11.6599	0.0627	down
Cpro00010186-RA	3224.33	11.6548	0.0627	down
Cpro00012916-RA	3215.73	11.6509	0.0627	down
Cpro00004022-RA	3208.15	11.6475	0.0627	down
Cpro00000856-RA	3205.88	11.6465	0.0627	down
Cpro00017507-RA	3197.97	11.6429	0.0627	down
Cpro00007307-RA	3196.01	11.6421	0.0627	down
Cpro00020134-RA	3195.61	11.6419	0.0627	down
Cpro00014214-RA	3192.44	11.6404	0.0627	down
Cpro00013584-RA	3191.38	11.64	0.0627	down
Cpro00024813-RA	3189.63	11.6392	0.0627	down
Cpro00004732-RA	3185.75	11.6374	0.0627	down
Cpro00000184-RA	3185.75	11.6374	0.0627	down
Cpro00001064-RA	3184.28	11.6368	0.0627	down
Cpro00016223-RA	3175.73	11.6329	0.0627	down
Cpro00000675-RA	3171.33	11.6309	0.0627	down
Cpro00022582-RA	3170.25	11.6304	0.0627	down
Cpro00026227-RA	3160.24	11.6258	0.0627	down
Cpro00014528-RA	3158.7	11.6251	0.0627	down
Cpro00002574-RA	3157.51	11.6246	0.0627	down
Cpro00018853-RA	3154.51	11.6232	0.0627	down
Cpro00011428-RA	3153.75	11.6229	0.0627	down
Cpro00006896-RA	3144.46	11.6186	0.0627	down
Cpro00017410-RA	3142.5	11.6177	0.0627	down
Cpro00001975-RA	3138.9	11.616	0.0627	down
Cpro00007372-RA	3128.32	11.6112	0.0627	down
Cpro00011592-RA	3123.28	11.6088	0.0627	down
Cpro00005905-RA	3123.28	11.6088	0.0627	down
Cpro00002995-RA	3120.42	11.6075	0.0627	down
Cpro00023169-RA	3111.94	11.6036	0.0627	down
Cpro00013603-RA	3105.81	11.6008	0.0627	down
Cpro00011313-RA	3103	11.5994	0.0627	down
Cpro00012540-RA	3101.74	11.5989	0.0627	down
Cpro00015405-RA	3098.44	11.5973	0.0627	down
Cpro00007192-RA	3092.05	11.5943	0.0627	down
Cpro00023472-RA	3090.19	11.5935	0.0627	down
Cpro00015406-RA	3074.99	11.5864	0.0627	down
Cpro00005645-RA	3073.31	11.5856	0.0627	down
Cpro00016377-RA	3070.66	11.5843	0.0627	down
Cpro00016006-RA	3063.22	11.5808	0.0627	down
Cpro00024052-RA	3061.61	11.5801	0.0627	down
Cpro00019212-RA	3061.61	11.5801	0.0627	down
Cpro00009644-RA	3060.03	11.5793	0.0627	down
Cpro00016883-RA	3054.71	11.5768	0.0627	down
Cpro00019569-RA	3045.2	11.5723	0.0627	down
Cpro00008326-RA	3035.83	11.5679	0.0627	down
Cpro00014172-RA	3035.3	11.5676	0.0627	down
Cpro00011759-RA	3034.71	11.5673	0.0627	down
Cpro00002208-RA	3034.04	11.567	0.0627	down
Cpro00025857-RA	3033.6	11.5668	0.0627	down
Cpro00015152-RA	3027.18	11.5638	0.0627	down
Cpro00025187-RA	3027.18	11.5638	0.0627	down
Cpro00025436-RA	3023.9	11.5622	0.0627	down
Cpro00016374-RA	3020.73	11.5607	0.0627	down
Cpro00025416-RA	3013.54	11.5572	0.0627	down
Cpro00025946-RA	3011.74	11.5564	0.0627	down
Cpro00021271-RA	3008.42	11.5548	0.0627	down
Cpro00016263-RA	3004.81	11.5531	0.0627	down
Cpro00019148-RA	2998.35	11.55	0.0627	down
Cpro00011181-RA	2996.58	11.5491	0.0627	down
Cpro00022492-RA	2995.28	11.5485	0.0627	down
Cpro00022677-RA	2988.02	11.545	0.0627	down
Cpro00015460-RA	2979.13	11.5407	0.0627	down
Cpro00022791-RA	2976.3	11.5393	0.0627	down
Cpro00000503-RA	2974.64	11.5385	0.0627	down
Cpro00021743-RA	2973.91	11.5381	0.0627	down
Cpro00018276-RA	2970.53	11.5365	0.0627	down
Cpro00026542-RA	2958.9	11.5308	0.0627	down
Cpro00011958-RA	2958.11	11.5305	0.0627	down
Cpro00017777-RA	2951.5	11.5272	0.0627	down
Cpro00022026-RA	2949.76	11.5264	0.0627	down
Cpro00006162-RA	2946.97	11.525	0.0627	down
Cpro00022408-RA	2934.51	11.5189	0.0627	down
Cpro00005883-RA	2928.08	11.5157	0.0627	down
Cpro00021063-RA	2923.39	11.5134	0.0627	down
Cpro00007470-RA	2919.07	11.5113	0.0627	down
Cpro00024288-RA	2912.55	11.5081	0.0627	down
Cpro00001957-RA	2906.42	11.505	0.0627	down
Cpro00006455-RA	2906.24	11.5049	0.0627	down
Cpro00018896-RA	2904.28	11.504	0.0627	down
Cpro00020224-RA	2901.63	11.5026	0.0627	down
Cpro00016251-RA	2894.68	11.4992	0.0627	down
Cpro00005152-RA	2883.97	11.4938	0.0627	down
Cpro00014400-RA	2883.03	11.4934	0.0627	down
Cpro00022781-RA	2869.51	11.4866	0.0627	down
Cpro00019859-RA	2861.15	11.4824	0.0627	down
Cpro00004064-RA	2859.67	11.4816	0.0627	down
Cpro00017141-RA	2859.42	11.4815	0.0627	down
Cpro00010260-RA	2857.8	11.4807	0.0627	down
Cpro00000278-RA	2857.8	11.4807	0.0627	down
Cpro00007404-RA	2857.41	11.4805	0.0627	down
Cpro00020956-RA	2853.54	11.4785	0.0627	down
Cpro00013687-RA	2845.66	11.4745	0.0627	down
Cpro00013440-RA	2844.82	11.4741	0.0627	down
Cpro00011351-RA	2828.74	11.4659	0.0627	down
Cpro00025290-RA	2823.36	11.4632	0.0627	down
Cpro00016436-RA	2810.95	11.4568	0.0627	down
Cpro00014923-RA	2810.95	11.4568	0.0627	down
Cpro00015469-RA	2810.95	11.4568	0.0627	down
Cpro00018011-RA	2810.95	11.4568	0.0627	down
Cpro00016817-RA	2810.95	11.4568	0.0627	down
Cpro00019830-RA	2810.95	11.4568	0.0627	down
Cpro00022625-RA	2810.95	11.4568	0.0627	down
Cpro00003198-RA	2810.95	11.4568	0.0627	down
Cpro00001511-RA	2810.95	11.4568	0.0627	down
Cpro00000181-RA	2810.95	11.4568	0.0627	down
Cpro00005996-RA	2790.58	11.4464	0.0627	down
Cpro00010450-RA	2789.98	11.446	0.0627	down
Cpro00025429-RA	2787.53	11.4448	0.0627	down
Cpro00022383-RA	2784.93	11.4434	0.0627	down
Cpro00004183-RA_	2784.56	11.4432	0.0627	down
Cpro00010443-RA	2783.12	11.4425	0.0627	down
Cpro00011770-RA	2779.37	11.4405	0.0627	down
Cpro00020014-RA	2779.01	11.4404	0.0627	down
Cpro00009570-RA	2776.14	11.4389	0.0627	down
Cpro00012947-RA	2775.37	11.4385	0.0627	down
Cpro00001450-RA	2775.37	11.4385	0.0627	down
Cpro00022382-RA	2773.47	11.4375	0.0627	down
Cpro00001685-RA	2773.31	11.4374	0.0627	down
Cpro00004173-RA	2773.22	11.4373	0.0627	down
Cpro00023118-RA	2772.45	11.4369	0.0627	down
Cpro00005026-RA	2769.61	11.4355	0.0627	down
Cpro00026914-RA	2767.03	11.4341	0.0627	down
Cpro00022235-RA	2765.25	11.4332	0.0627	down
Cpro00026686-RA	2764.87	11.433	0.0627	down
Cpro00002884-RA	2748.49	11.4244	0.0627	down
Cpro00004095-RA	2745.58	11.4229	0.0627	down
Cpro00001635-RA	2741.26	11.4206	0.0627	down
Cpro00009391-RA	2737.94	11.4189	0.0627	down
Cpro00011918-RA	2736.98	11.4184	0.0627	down
Cpro00010982-RA	2732.87	11.4162	0.0627	down
Cpro00006060-RA	2732.87	11.4162	0.0627	down
Cpro00021993-RA	2731.77	11.4156	0.0627	down
Cpro00010876-RA	2730.35	11.4149	0.0627	down
Cpro00011362-RA	2727.04	11.4131	0.0627	down
Cpro00009274-RA	2727.04	11.4131	0.0627	down
Cpro00026126-RA	2726.62	11.4129	0.0627	down
Cpro00022290-RA	2719.54	11.4091	0.0627	down
Cpro00022742-RA	2710.56	11.4044	0.0627	down
Cpro00008214-RA	2710.56	11.4044	0.0627	down
Cpro00024310-RA	2702.38	11.4	0.0627	down
Cpro00018244-RA	2700.28	11.3989	0.0627	down
Cpro00020826-RA	2698.51	11.3979	0.0627	down
Cpro00015915-RA	2696.48	11.3969	0.0627	down
Cpro00005358-RA	2693.83	11.3954	0.0627	down
Cpro00014116-RA	2689.87	11.3933	0.0627	down
Cpro00026820-RA	2685.62	11.391	0.0627	down
Cpro00005433-RA	2683.18	11.3897	0.0627	down
Cpro00021800-RA	2679.19	11.3876	0.0627	down
Cpro00001081-RA	2678.36	11.3871	0.0627	down
Cpro00021163-RA	2677.1	11.3865	0.0627	down
Cpro00007236-RA	2675.72	11.3857	0.0627	down
Cpro00002132-RA	2672.14	11.3838	0.0627	down
Cpro00013799-RA	2671.8	11.3836	0.0627	down
Cpro00013977-RA	2670.41	11.3828	0.0627	down
Cpro00017778-RA	2670.1	11.3827	0.0627	down
Cpro00016831-RA	2668.63	11.3819	0.0627	down
Cpro00000762-RA	2664.3	11.3795	0.0627	down
Cpro00002079-RA	2664.11	11.3794	0.0627	down
Cpro00022376-RA	2663.53	11.3791	0.0627	down
Cpro00015374-RA	2663.01	11.3788	0.0627	down
Cpro00006578-RA	2659.01	11.3767	0.0627	down
Cpro00015521-RA	2649.4	11.3715	0.0627	down
Cpro00020207-RA	2647.35	11.3703	0.0627	down
Cpro00019104-RA	2647.35	11.3703	0.0627	down
Cpro00026316-RA	2646.81	11.37	0.0627	down
Cpro00023247-RA	2645.6	11.3694	0.0627	down
Cpro00020688-RA	2638.85	11.3657	0.0627	down
Cpro00020399-RA	2636.82	11.3646	0.0627	down
Cpro00027059-RA	2631.31	11.3616	0.0627	down
Cpro00024622-RA	2629.15	11.3604	0.0627	down
Cpro00015957-RA	2623.56	11.3573	0.0627	down
Cpro00008010-RA	2623.56	11.3573	0.0627	down
Cpro00022842-RA	2618.2	11.3544	0.0627	down
Cpro00005660-RA	2617.61	11.354	0.0627	down
Cpro00007058-RA	2617.09	11.3538	0.0627	down
Cpro00003875-RA	2607.61	11.3485	0.0627	down
Cpro00001584-RA	2607.53	11.3485	0.0627	down
Cpro00016663-RA	2601.87	11.3453	0.0627	down
Cpro00012135-RA	2600.13	11.3444	0.0627	down
Cpro00022784-RA	2599.45	11.344	0.0627	down
Cpro00010425-RA	2596.38	11.3423	0.0627	down
Cpro00013226-RA	2592.32	11.34	0.0627	down
Cpro00000972-RA	2587.07	11.3371	0.0627	down
Cpro00016136-RA	2586.08	11.3365	0.0627	down
Cpro00000592-RA	2584.26	11.3355	0.0627	down
Cpro00016437-RA	2576.71	11.3313	0.0627	down
Cpro00006829-RA	2575.07	11.3304	0.0627	down
Cpro00009136-RA	2571.38	11.3283	0.0627	down
Cpro00001046-RA	2570.99	11.3281	0.0627	down
Cpro00005550-RA	2570.41	11.3278	0.0627	down
Cpro00016430-RA	2566.52	11.3256	0.0627	down
Cpro00025387-RA	2564.38	11.3244	0.0627	down
Cpro00007075-RA	2559.57	11.3217	0.0627	down
Cpro00012986-RA	2558.69	11.3212	0.0627	down
Cpro00002974-RA	2555.41	11.3193	0.0627	down
Cpro00009714-RA	2555.41	11.3193	0.0627	down
Cpro00017731-RA	2547.43	11.3148	0.0627	down
Cpro00002871-RA	2547.14	11.3147	0.0627	down
Cpro00020909-RA	2541.7	11.3116	0.0627	down
Cpro00021260-RA	2541.41	11.3114	0.0627	down
Cpro00010674-RA	2537.32	11.3091	0.0627	down
Cpro00021194-RA	2529.86	11.3048	0.0627	down
Cpro00003784-RA	2528.09	11.3038	0.0627	down
Cpro00011760-RA	2525.47	11.3023	0.0627	down
Cpro00024636-RA	2522.65	11.3007	0.0627	down
Cpro00023580-RA	2521.98	11.3003	0.0627	down
Cpro00021475-RA	2521.16	11.2999	0.0627	down
Cpro00001959-RA	2518.72	11.2985	0.0627	down
Cpro00001592-RA	2518.48	11.2983	0.0627	down
Cpro00004155-RA	2511.91	11.2946	0.0627	down
Cpro00012120-RA	2504.3	11.2902	0.0627	down
Cpro00001519-RA	2502.43	11.2891	0.0627	down
Cpro00023306-RA	2491.53	11.2828	0.0627	down
Cpro00008843-RA	2490.72	11.2823	0.0627	down
Cpro00017691-RA	2489.7	11.2818	0.0627	down
Cpro00024287-RA	2489.7	11.2818	0.0627	down
Cpro00001311-RA	2489.09	11.2814	0.0627	down
Cpro00003791-RA	2489.09	11.2814	0.0627	down
Cpro00016509-RA	2486.61	11.28	0.0627	down
Cpro00027246-RA	2486.61	11.28	0.0627	down
Cpro00003185-RA	2481.46	11.277	0.0627	down
Cpro00024657-RA	2478.08	11.275	0.0627	down
Cpro00025077-RA	2463.53	11.2665	0.0627	down
Cpro00023172-RA	2459.58	11.2642	0.0627	down
Cpro00021797-RA	2459.58	11.2642	0.0627	down
Cpro00007399-RA	2457.37	11.2629	0.0627	down
Cpro00007556-RA	2456.98	11.2627	0.0627	down
Cpro00024307-RA	2455.89	11.262	0.0627	down
Cpro00000432-RA	2455.35	11.2617	0.0627	down
Cpro00004188-RA	2454.64	11.2613	0.0627	down
Cpro00020485-RA	2448.25	11.2575	0.0627	down
Cpro00015015-RA	2447.07	11.2568	0.0627	down
Cpro00024153-RA	2444.31	11.2552	0.0627	down
Cpro00018256-RA	2443.16	11.2545	0.0627	down
Cpro00023206-RA	2439.7	11.2525	0.0627	down
Cpro00011341-RA	2436.16	11.2504	0.0627	down
Cpro00020386-RA	2433.01	11.2485	0.0627	down
Cpro00009266-RA	2432.55	11.2483	0.0627	down
Cpro00017392-RA	2431.09	11.2474	0.0627	down
Cpro00013191-RA	2431.09	11.2474	0.0627	down
Cpro00013978-RA	2425.14	11.2438	0.0627	down
Cpro00005501-RA	2424.61	11.2435	0.0627	down
Cpro00000134-RA	2424.45	11.2434	0.0627	down
Cpro00022837-RA	2423.4	11.2428	0.0627	down
Cpro00004001-RA	2420.12	11.2409	0.0627	down
Cpro00021031-RA	2420.03	11.2408	0.0627	down
Cpro00017465-RA	2419.86	11.2407	0.0627	down
Cpro00008888-RA	2418.02	11.2396	0.0627	down
Cpro00025144-RA	2417.42	11.2393	0.0627	down
Cpro00021315-RA	2415.04	11.2378	0.0627	down
Cpro00000158-RA	2415.04	11.2378	0.0627	down
Cpro00021199-RA	2413.44	11.2369	0.0627	down
Cpro00019714-RA	2407.33	11.2332	0.0627	down
Cpro00019496-RA	2406.18	11.2325	0.0627	down
Cpro00025726-RA	2403.57	11.231	0.0627	down
Cpro00011571-RA	2400.36	11.229	0.0627	down
Cpro00026495-RA	2398.68	11.228	0.0627	down
Cpro00026183-RA	2396.52	11.2267	0.0627	down
Cpro00001714-RA	2396.22	11.2265	0.0627	down
Cpro00020323-RA	2392.3	11.2242	0.0627	down
Cpro00022680-RA	2389.31	11.2224	0.0627	down
Cpro00021056-RA	2389.31	11.2224	0.0627	down
Cpro00001261-RA	2383.97	11.2192	0.0627	down
Cpro00015408-RA	2383.2	11.2187	0.0627	down
Cpro00025517-RA	2381.5	11.2177	0.0627	down
Cpro00000935-RA	2374.47	11.2134	0.0627	down
Cpro00010729-RA	2372.88	11.2124	0.0627	down
Cpro00018627-RA	2370.68	11.2111	0.0627	down
Cpro00005308-RA	2370.68	11.2111	0.0627	down
Cpro00008408-RA	2363.56	11.2067	0.0627	down
Cpro00018348-RA	2361.2	11.2053	0.0627	down
Cpro00023915-RA	2361.2	11.2053	0.0627	down
Cpro00007785-RA	2361.2	11.2053	0.0627	down
Cpro00014113-RA	2359.19	11.2041	0.0627	down
Cpro00010518-RA	2358.34	11.2036	0.0627	down
Cpro00007831-RA	2353.75	11.2007	0.0627	down
Cpro00006361-RA	2353.36	11.2005	0.0627	down
Cpro00013223-RA	2351.47	11.1993	0.0627	down
Cpro00009899-RA	2349.01	11.1978	0.0627	down
Cpro00012449-RA	2348.88	11.1978	0.0627	down
Cpro00026124-RA	2347.61	11.197	0.0627	down
Cpro00010571-RA	2342.46	11.1938	0.0627	down
Cpro00000289-RA	2338.52	11.1914	0.0627	down
Cpro00019501-RA	2335.25	11.1894	0.0627	down
Cpro00010223-RA	2334.9	11.1891	0.0627	down
Cpro00001217-RA	2333.94	11.1886	0.0627	down
Cpro00014681-RA	2333.09	11.188	0.0627	down
Cpro00018052-RA	2331.81	11.1872	0.0627	down
Cpro00018674-RA	2331.31	11.1869	0.0627	down
Cpro00024209-RA	2330.69	11.1865	0.0627	down
Cpro00008571-RA	2329.07	11.1855	0.0627	down
Cpro00010842-RA	2319.04	11.1793	0.0627	down
Cpro00011054-RA	2314.9	11.1767	0.0627	down
Cpro00002189-RA	2314.38	11.1764	0.0627	down
Cpro00006150-RA	2307.1	11.1719	0.0627	down
Cpro00001380-RA	2305.86	11.1711	0.0627	down
Cpro00026511-RA	2305.61	11.1709	0.0627	down
Cpro00007635-RA	2302.59	11.169	0.0627	down
Cpro00019677-RA	2302.07	11.1687	0.0627	down
Cpro00019890-RA	2293.15	11.1631	0.0627	down
Cpro00022799-RA	2288.26	11.16	0.0627	down
Cpro00009948-RA	2287.99	11.1599	0.0627	down
Cpro00005257-RA	2286.88	11.1592	0.0627	down
Cpro00001742-RA	2285.33	11.1582	0.0627	down
Cpro00022366-RA	2283.9	11.1573	0.0627	down
Cpro00022108-RA	2277.49	11.1532	0.0627	down
Cpro00010320-RA	2277.23	11.1531	0.0627	down
Cpro00006628-RA	2275.53	11.152	0.0627	down
Cpro00022223-RA	2274.03	11.151	0.0627	down
Cpro00006412-RA	2269.39	11.1481	0.0627	down
Cpro00025050-RA	2265.97	11.1459	0.0627	down
Cpro00003817-RA	2265.14	11.1454	0.0627	down
Cpro00017351-RA	2264.38	11.1449	0.0627	down
Cpro00010970-RA	2262.47	11.1437	0.0627	down
Cpro00005891-RA	2260.77	11.1426	0.0627	down
Cpro00022852-RA	2258.8	11.1413	0.0627	down
Cpro00023584-RA	2257.98	11.1408	0.0627	down
Cpro00000819-RA	2256	11.1396	0.0627	down
Cpro00004967-RA	2253.61	11.138	0.0627	down
Cpro00005024-RA	2251.63	11.1368	0.0627	down
Cpro00026745-RA	2248.76	11.1349	0.0627	down
Cpro00022725-RA	2248.76	11.1349	0.0627	down
Cpro00007862-RA	2248.76	11.1349	0.0627	down
Cpro00007857-RA	2248.76	11.1349	0.0627	down
Cpro00021865-RA	2246.25	11.1333	0.0627	down
Cpro00026566-RA	2244.86	11.1324	0.0627	down
Cpro00007990-RA	2244.04	11.1319	0.0627	down
Cpro00004112-RA	2242.78	11.1311	0.0627	down
Cpro00018525-RA	2241.65	11.1303	0.0627	down
Cpro00015820-RA	2239.8	11.1292	0.0627	down
Cpro00012751-RA	2238.35	11.1282	0.0627	down
Cpro00016659-RA	2237.29	11.1275	0.0627	down
Cpro00006090-RA	2235.99	11.1267	0.0627	down
Cpro00009932-RA	2233	11.1248	0.0627	down
Cpro00001858-RA	2232.23	11.1243	0.0627	down
Cpro00026864-RA	2229.38	11.1224	0.0627	down
Cpro00025976-RA	2227.36	11.1211	0.0627	down
Cpro00014566-RA	2226.01	11.1202	0.0627	down
Cpro00022000-RA	2225.34	11.1198	0.0627	down
Cpro00010637-RA	2224.05	11.119	0.0627	down
Cpro00023734-RA	2221.99	11.1176	0.0627	down
Cpro00021714-RA	2219.93	11.1163	0.0627	down
Cpro00023604-RA	2214.69	11.1129	0.0627	down
Cpro00026428-RA	2214.38	11.1127	0.0627	down
Cpro00015165-RA	2213.26	11.112	0.0627	down
Cpro00021980-RA	2208.61	11.1089	0.0627	down
Cpro00012034-RA	2207.26	11.108	0.0627	down
Cpro00021816-RA	2206.06	11.1073	0.0627	down
Cpro00015035-RA	2204.04	11.1059	0.0627	down
Cpro00013703-RA	2203.18	11.1054	0.0627	down
Cpro00012511-RA	2201.91	11.1045	0.0627	down
Cpro00012403-RA	2198.04	11.102	0.0627	down
Cpro00025533-RA	2197.39	11.1016	0.0627	down
Cpro00020615-RA	2195.22	11.1001	0.0627	down
Cpro00009882-RA	2194.85	11.0999	0.0627	down
Cpro00006671-RA	2191.87	11.0979	0.0627	down
Cpro00019595-RA	2189.3	11.0963	0.0627	down
Cpro00016074-RA	2188.27	11.0956	0.0627	down
Cpro00019404-RA	2183.89	11.0927	0.0627	down
Cpro00014398-RA	2181.64	11.0912	0.0627	down
Cpro00016497-RA	2180.91	11.0907	0.0627	down
Cpro00020591-RA	2179.28	11.0896	0.0627	down
Cpro00012338-RA	2179.1	11.0895	0.0627	down
Cpro00025178-RA	2178.49	11.0891	0.0627	down
Cpro00015602-RA	2174.79	11.0867	0.0627	down
Cpro00020618-RA	2174.51	11.0865	0.0627	down
Cpro00025702-RA	2173.42	11.0857	0.0627	down
Cpro00021799-RA	2167.92	11.0821	0.0627	down
Cpro00014535-RA	2167.77	11.082	0.0627	down
Cpro00008921-RA	2165.58	11.0805	0.0627	down
Cpro00002590-RA	2164.43	11.0798	0.0627	down
Cpro00023411-RA	2162.27	11.0783	0.0627	down
Cpro00016402-RA	2160.38	11.0771	0.0627	down
Cpro00000054-RA	2159.14	11.0762	0.0627	down
Cpro00004926-RA	2158.81	11.076	0.0627	down
Cpro00025879-RA	2157.9	11.0754	0.0627	down
Cpro00011999-RA	2157.7	11.0753	0.0627	down
Cpro00026540-RA	2156.95	11.0748	0.0627	down
Cpro00019788-RA	2156.35	11.0744	0.0627	down
Cpro00008654-RA	2155.06	11.0735	0.0627	down
Cpro00007741-RA	2154.5	11.0731	0.0627	down
Cpro00014697-RA	2153.95	11.0728	0.0627	down
Cpro00001884-RA	2153.72	11.0726	0.0627	down
Cpro00025049-RA	2153.55	11.0725	0.0627	down
Cpro00013463-RA	2152.14	11.0716	0.0627	down
Cpro00019679-RA	2151.24	11.071	0.0627	down
Cpro00001961-RA	2150.66	11.0706	0.0627	down
Cpro00001741-RA	2150.46	11.0704	0.0627	down
Cpro00013309-RA	2147.26	11.0683	0.0627	down
Cpro00004371-RA	2147.26	11.0683	0.0627	down
Cpro00021900-RA	2145.2	11.0669	0.0627	down
Cpro00003368-RA	2142.4	11.065	0.0627	down
Cpro00021266-RA	2142.04	11.0648	0.0627	down
Cpro00015523-RA	2141.68	11.0645	0.0627	down
Cpro00022549-RA	2141.16	11.0642	0.0627	down
Cpro00025810-RA	2140.65	11.0638	0.0627	down
Cpro00023164-RA	2138.39	11.0623	0.0627	down
Cpro00002503-RA	2133.73	11.0592	0.0627	down
Cpro00021242-RA	2133.61	11.0591	0.0627	down
Cpro00016338-RA	2133.02	11.0587	0.0627	down
Cpro00014869-RA	2130.88	11.0572	0.0627	down
Cpro00024109-RA	2130.68	11.0571	0.0627	down
Cpro00001333-RA	2127.92	11.0552	0.0627	down
Cpro00015014-RA	2123.83	11.0525	0.0627	down
Cpro00011656-RA	2123.83	11.0525	0.0627	down
Cpro00017719-RA	2123.04	11.0519	0.0627	down
Cpro00017885-RA	2123.04	11.0519	0.0627	down
Cpro00023829-RA	2120.84	11.0504	0.0627	down
Cpro00003256-RA	2120.54	11.0502	0.0627	down
Cpro00010834-RA	2118.4	11.0488	0.0627	down
Cpro00006221-RA	2117.84	11.0484	0.0627	down
Cpro00006566-RA	2113.42	11.0454	0.0627	down
Cpro00011455-RA	2108.22	11.0418	0.0627	down
Cpro00011139-RA	2108.22	11.0418	0.0627	down
Cpro00023883-RA	2108.22	11.0418	0.0627	down
Cpro00025176-RA	2108.22	11.0418	0.0627	down
Cpro00004476-RA	2104.01	11.0389	0.0627	down
Cpro00023434-RA	2101.88	11.0375	0.0627	down
Cpro00017928-RA	2098.32	11.035	0.0627	down
Cpro00016262-RA	2095.12	11.0328	0.0627	down
Cpro00024586-RA	2094.86	11.0326	0.0627	down
Cpro00024917-RA	2093.87	11.032	0.0627	down
Cpro00014019-RA	2093.26	11.0315	0.0627	down
Cpro00022491-RA	2091.87	11.0306	0.0627	down
Cpro00007045-RA	2091.87	11.0306	0.0627	down
Cpro00015843-RA	2090.79	11.0298	0.0627	down
Cpro00020112-RA	2090.65	11.0297	0.0627	down
Cpro00004244-RA	2089.22	11.0288	0.0627	down
Cpro00025225-RA	2088.14	11.028	0.0627	down
Cpro00016958-RA	2084.13	11.0252	0.0627	down
Cpro00026398-RA	2082.66	11.0242	0.0627	down
Cpro00002475-RA	2080.98	11.023	0.0627	down
Cpro00004516-RA	2080.55	11.0227	0.0627	down
Cpro00026709-RA	2080.11	11.0224	0.0627	down
Cpro00002882-RA	2077.99	11.021	0.0627	down
Cpro00015558-RA	2077.66	11.0207	0.0627	down
Cpro00015416-RA	2077.66	11.0207	0.0627	down
Cpro00010182-RA	2077.66	11.0207	0.0627	down
Cpro00011065-RA	2077.66	11.0207	0.0627	down
Cpro00004750-RA	2077.66	11.0207	0.0627	down
Cpro00013983-RA	2073.65	11.018	0.0627	down
Cpro00020549-RA	2072.48	11.0171	0.0627	down
Cpro00021604-RA	2072.31	11.017	0.0627	down
Cpro00013067-RA	2071.23	11.0163	0.0627	down
Cpro00000287-RA	2069.6	11.0151	0.0627	down
Cpro00010362-RA	2069.03	11.0147	0.0627	down
Cpro00001664-RA	2068.44	11.0143	0.0627	down
Cpro00000398-RA	2066.88	11.0132	0.0627	down
Cpro00004730-RA	2064.92	11.0119	0.0627	down
Cpro00006238-RA	2064.29	11.0114	0.0627	down
Cpro00017704-RA	2061.36	11.0094	0.0627	down
Cpro00004748-RA	2061.36	11.0094	0.0627	down
Cpro00008411-RA	2060.08	11.0085	0.0627	down
Cpro00000212-RA	2057.57	11.0067	0.0627	down
Cpro00026232-RA	2056.8	11.0062	0.0627	down
Cpro00005872-RA	2055.24	11.0051	0.0627	down
Cpro00015836-RA	2054.79	11.0048	0.0627	down
Cpro00013857-RA	2054.59	11.0046	0.0627	down
Cpro00021467-RA	2053.76	11.0041	0.0627	down
Cpro00016218-RA	2052.44	11.0031	0.0627	down
Cpro00013981-RA	2050.34	11.0016	0.0627	down
Cpro00017728-RA	2049.11	11.0008	0.0627	down
Cpro00012578-RA	2049.11	11.0008	0.0627	down
Cpro00016661-RA	2048.29	11.0002	0.0627	down
Cpro00011851-RA	2047.98	11	0.0627	down
Cpro00013426-RA	2047.98	11	0.0627	down
Cpro00006411-RA	2041.64	10.9955	0.0627	down
Cpro00012992-RA	2040.64	10.9948	0.0627	down
Cpro00006897-RA_	2040.21	10.9945	0.0627	down
Cpro00024286-RA	2040.21	10.9945	0.0627	down
Cpro00009687-RA	2040.21	10.9945	0.0627	down
Cpro00010197-RA	2038.48	10.9933	0.0627	down
Cpro00018188-RA	2036.92	10.9922	0.0627	down
Cpro00012893-RA	2036.68	10.992	0.0627	down
Cpro00020689-RA	2035.68	10.9913	0.0627	down
Cpro00019209-RA	2034.06	10.9901	0.0627	down
Cpro00015866-RA	2028.96	10.9865	0.0627	down
Cpro00003126-RA	2027.57	10.9855	0.0627	down
Cpro00016069-RA	2026.5	10.9848	0.0627	down
Cpro00023271-RA	2023.89	10.9829	0.0627	down
Cpro00026267-RA	2022.52	10.9819	0.0627	down
Cpro00026116-RA	2021.91	10.9815	0.0627	down
Cpro00022749-RA	2021.91	10.9815	0.0627	down
Cpro00005029-RA	2021.58	10.9813	0.0627	down
Cpro00021706-RA	2020.85	10.9807	0.0627	down
Cpro00002685-RA	2020.37	10.9804	0.0627	down
Cpro00005914-RA	2019.93	10.9801	0.0627	down
Cpro00022038-RA	2019.59	10.9798	0.0627	down
Cpro00022155-RA	2017.54	10.9784	0.0627	down
Cpro00007636-RA	2016.95	10.978	0.0627	down
Cpro00013176-RA	2015.4	10.9769	0.0627	down
Cpro00001675-RA	2014.79	10.9764	0.0627	down
Cpro00003976-RA	2014.52	10.9762	0.0627	down
Cpro00009299-RA	2010.76	10.9735	0.0627	down
Cpro00001629-RA	2007.82	10.9714	0.0627	down
Cpro00017844-RA	2005.73	10.9699	0.0627	down
Cpro00020617-RA	2005.73	10.9699	0.0627	down
Cpro00003418-RA	2005.02	10.9694	0.0627	down
Cpro00025744-RA	2003.21	10.9681	0.0627	down
Cpro00005773-RA	2001.74	10.967	0.0627	down
Cpro00018770-RA	1999.23	10.9652	0.0627	down
Cpro00018280-RA	1998.9	10.965	0.0627	down
Cpro00006571-RA	1998.9	10.965	0.0627	down
Cpro00021087-RA	1997.26	10.9638	0.0627	down
Cpro00026954-RA	1994.87	10.9621	0.0627	down
Cpro00004421-RA	1992.84	10.9606	0.0627	down
Cpro00019214-RA	1992.01	10.96	0.0627	down
Cpro00003032-RA	1991.09	10.9593	0.0627	down
Cpro00024305-RA	1990.59	10.959	0.0627	down
Cpro00025662-RA	1989.78	10.9584	0.0627	down
Cpro00024320-RA	1985.36	10.9552	0.0627	down
Cpro00020322-RA	1984.2	10.9543	0.0627	down
Cpro00000430-RA	1981.49	10.9524	0.0627	down
Cpro00000071-RA	1979.14	10.9507	0.0627	down
Cpro00016820-RA	1976.45	10.9487	0.0627	down
Cpro00002612-RA	1976.45	10.9487	0.0627	down
Cpro00015553-RA	1975.26	10.9478	0.0627	down
Cpro00014554-RA	1974.36	10.9472	0.0627	down
Cpro00012991-RA	1969.58	10.9437	0.0627	down
Cpro00025491-RA	1969.46	10.9436	0.0627	down
Cpro00020663-RA	1966.87	10.9417	0.0627	down
Cpro00021753-RA	1966.21	10.9412	0.0627	down
Cpro00017747-RA	1965.94	10.941	0.0627	down
Cpro00004408-RA	1964.85	10.9402	0.0627	down
Cpro00010966-RA	1964.47	10.9399	0.0627	down
Cpro00002576-RA	1961.42	10.9377	0.0627	down
Cpro00023931-RA	1961.13	10.9375	0.0627	down
Cpro00013979-RA	1960.27	10.9368	0.0627	down
Cpro00019405-RA	1959.4	10.9362	0.0627	down
Cpro00023886-RA	1959.15	10.936	0.0627	down
Cpro00016665-RA	1956.99	10.9344	0.0627	down
Cpro00017775-RA	1956.42	10.934	0.0627	down
Cpro00000452-RA	1955.91	10.9336	0.0627	down
Cpro00002878-RA	1955.44	10.9333	0.0627	down
Cpro00025417-RA	1954.89	10.9329	0.0627	down
Cpro00010859-RA	1951.4	10.9303	0.0627	down
Cpro00017869-RA	1949.94	10.9292	0.0627	down
Cpro00018564-RA	1948.5	10.9281	0.0627	down
Cpro00013710-RA	1947.75	10.9276	0.0627	down
Cpro00023030-RA	1946.04	10.9263	0.0627	down
Cpro00026694-RA	1946.04	10.9263	0.0627	down
Cpro00025752-RA	1946.04	10.9263	0.0627	down
Cpro00002218-RA	1946.04	10.9263	0.0627	down
Cpro00012384-RA	1943.96	10.9248	0.0627	down
Cpro00000979-RA	1942.86	10.924	0.0627	down
Cpro00012754-RA	1942.65	10.9238	0.0627	down
Cpro00023198-RA	1940.46	10.9222	0.0627	down
Cpro00016254-RA	1938.59	10.9208	0.0627	down
Cpro00019746-RA	1935.69	10.9186	0.0627	down
Cpro00020961-RA	1932.53	10.9163	0.0627	down
Cpro00006431-RA	1932.53	10.9163	0.0627	down
Cpro00001599-RA	1927.51	10.9125	0.0627	down
Cpro00022438-RA	1927.1	10.9122	0.0627	down
Cpro00000830-RA	1925.31	10.9109	0.0627	down
Cpro00011762-RA	1924.42	10.9102	0.0627	down
Cpro00017858-RA	1921.77	10.9082	0.0627	down
Cpro00009753-RA	1919.31	10.9064	0.0627	down
Cpro00022367-RA	1918.06	10.9054	0.0627	down
Cpro00008844-RA	1914.71	10.9029	0.0627	down
Cpro00026354-RA	1913.01	10.9016	0.0627	down
Cpro00023013-RA	1912.61	10.9013	0.0627	down
Cpro00025770-RA	1912.21	10.901	0.0627	down
Cpro00012749-RA	1912.1	10.9009	0.0627	down
Cpro00008079-RA	1910.01	10.8994	0.0627	down
Cpro00003229-RA	1908.16	10.898	0.0627	down
Cpro00024975-RA	1908.04	10.8979	0.0627	down
Cpro00022473-RA	1904.79	10.8954	0.0627	down
Cpro00016009-RA	1903.75	10.8946	0.0627	down
Cpro00009655-RA	1903.48	10.8944	0.0627	down
Cpro00018022-RA	1903.25	10.8942	0.0627	down
Cpro00012464-RA	1903.07	10.8941	0.0627	down
Cpro00026250-RA	1902.02	10.8933	0.0627	down
Cpro00017277-RA	1901.53	10.8929	0.0627	down
Cpro00003288-RA	1900.36	10.8921	0.0627	down
Cpro00021827-RA	1899.29	10.8912	0.0627	down
Cpro00018218-RA	1898.89	10.8909	0.0627	down
Cpro00010202-RA	1898.89	10.8909	0.0627	down
Cpro00000072-RA	1897.84	10.8901	0.0627	down
Cpro00000836-RA	1897.39	10.8898	0.0627	down
Cpro00010385-RA	1896.82	10.8894	0.0627	down
Cpro00003847-RA	1896.55	10.8892	0.0627	down
Cpro00003697-RA	1896.15	10.8889	0.0627	down
Cpro00007073-RA_	1893.9	10.8871	0.0627	down
Cpro00003776-RA	1891.99	10.8857	0.0627	down
Cpro00014141-RA	1888.61	10.8831	0.0627	down
Cpro00020507-RA	1888.61	10.8831	0.0627	down
Cpro00006343-RA	1888.27	10.8829	0.0627	down
Cpro00021030-RA	1886.3	10.8813	0.0627	down
Cpro00021497-RA	1886.3	10.8813	0.0627	down
Cpro00012614-RA	1885.83	10.881	0.0627	down
Cpro00009839-RA	1885.83	10.881	0.0627	down
Cpro00024019-RA	1884.44	10.8799	0.0627	down
Cpro00005270-RA	1884.27	10.8798	0.0627	down
Cpro00006973-RA	1884.27	10.8798	0.0627	down
Cpro00013192-RA	1882.81	10.8787	0.0627	down
Cpro00001793-RA	1880.57	10.877	0.0627	down
Cpro00011231-RA	1879.06	10.8758	0.0627	down
Cpro00006547-RA	1878.47	10.8753	0.0627	down
Cpro00011452-RA	1873.97	10.8719	0.0627	down
Cpro00013991-RA	1873.97	10.8719	0.0627	down
Cpro00020050-RA	1873.97	10.8719	0.0627	down
Cpro00020083-RA	1873.97	10.8719	0.0627	down
Cpro00005280-RA	1873.97	10.8719	0.0627	down
Cpro00005661-RA	1873.97	10.8719	0.0627	down
Cpro00006877-RA	1873.97	10.8719	0.0627	down
Cpro00011523-RA	1871.91	10.8703	0.0627	down
Cpro00012726-RA	1871.01	10.8696	0.0627	down
Cpro00000193-RA	1865.89	10.8656	0.0627	down
Cpro00018649-RA	1864.96	10.8649	0.0627	down
Cpro00004577-RA	1864.96	10.8649	0.0627	down
Cpro00012538-RA	1864.69	10.8647	0.0627	down
Cpro00005346-RA	1864.69	10.8647	0.0627	down
Cpro00022109-RA	1864.11	10.8643	0.0627	down
Cpro00006096-RA	1864.11	10.8643	0.0627	down
Cpro00013275-RA	1862.81	10.8633	0.0627	down
Cpro00009902-RA	1861.8	10.8625	0.0627	down
Cpro00015016-RA	1860.19	10.8612	0.0627	down
Cpro00007287-RA	1859.55	10.8607	0.0627	down
Cpro00009236-RA	1857.36	10.859	0.0627	down
Cpro00000735-RA	1855.23	10.8574	0.0627	down
Cpro00015729-RA	1853.71	10.8562	0.0627	down
Cpro00008224-RA	1850.54	10.8537	0.0627	down
Cpro00018226-RA	1849.79	10.8531	0.0627	down
Cpro00008451-RA	1847.2	10.8511	0.0627	down
Cpro00023712-RA	1845.32	10.8497	0.0627	down
Cpro00012455-RA	1843.67	10.8484	0.0627	down
Cpro00017341-RA	1842.31	10.8473	0.0627	down
Cpro00015383-RA	1841.66	10.8468	0.0627	down
Cpro00002903-RA	1840.8	10.8461	0.0627	down
Cpro00002131-RA	1838.61	10.8444	0.0627	down
Cpro00013823-RA	1836.56	10.8428	0.0627	down
Cpro00024051-RA	1835.72	10.8421	0.0627	down
Cpro00013871-RA	1835.39	10.8419	0.0627	down
Cpro00001671-RA	1834.27	10.841	0.0627	down
Cpro00015665-RA	1832.63	10.8397	0.0627	down
Cpro00009076-RA	1829.35	10.8371	0.0627	down
Cpro00002161-RA	1829.19	10.837	0.0627	down
Cpro00021935-RA	1827.12	10.8354	0.0627	down
Cpro00007237-RA	1826.47	10.8348	0.0627	down
Cpro00015328-RA	1825.29	10.8339	0.0627	down
Cpro00023997-RA	1825.29	10.8339	0.0627	down
Cpro00000191-RA	1823.32	10.8324	0.0627	down
Cpro00006742-RA	1821.69	10.8311	0.0627	down
Cpro00020625-RA	1820.73	10.8303	0.0627	down
Cpro00014184-RA	1820.43	10.8301	0.0627	down
Cpro00013562-RA	1819.59	10.8294	0.0627	down
Cpro00019475-RA	1817.18	10.8275	0.0627	down
Cpro00010267-RA	1813.52	10.8246	0.0627	down
Cpro00004161-RA	1812.58	10.8238	0.0627	down
Cpro00020505-RA	1812.33	10.8236	0.0627	down
Cpro00021715-RA	1810.9	10.8225	0.0627	down
Cpro00009340-RA	1810.74	10.8224	0.0627	down
Cpro00016885-RA	1809.35	10.8213	0.0627	down
Cpro00016544-RA	1809.12	10.8211	0.0627	down
Cpro00006203-RA	1804.93	10.8177	0.0627	down
Cpro00001994-RA	1804.93	10.8177	0.0627	down
Cpro00009910-RA	1804.56	10.8174	0.0627	down
Cpro00017625-RA	1804.04	10.817	0.0627	down
Cpro00021171-RA	1804.04	10.817	0.0627	down
Cpro00020043-RA	1802.68	10.8159	0.0627	down
Cpro00018815-RA	1801.89	10.8153	0.0627	down
Cpro00009961-RA	1801.89	10.8153	0.0627	down
Cpro00018739-RA	1801.32	10.8148	0.0627	down
Cpro00008117-RA	1800.48	10.8142	0.0627	down
Cpro00013608-RA	1800.12	10.8139	0.0627	down
Cpro00017834-RA	1799.54	10.8134	0.0627	down
Cpro00023143-RA	1799.01	10.813	0.0627	down
Cpro00001516-RA	1798	10.8122	0.0627	down
Cpro00014962-RA	1797.17	10.8115	0.0627	down
Cpro00026860-RA	1797.17	10.8115	0.0627	down
Cpro00011946-RA	1796.88	10.8113	0.0627	down
Cpro00014296-RA	1795.89	10.8105	0.0627	down
Cpro00005865-RA	1794.22	10.8091	0.0627	down
Cpro00000132-RA	1793.66	10.8087	0.0627	down
Cpro00001472-RA	1792.81	10.808	0.0627	down
Cpro00012887-RA	1791.6	10.807	0.0627	down
Cpro00025151-RA	1791.05	10.8066	0.0627	down
Cpro00023220-RA	1790.06	10.8058	0.0627	down
Cpro00014247-RA	1788.79	10.8048	0.0627	down
Cpro00000063-RA	1788.79	10.8048	0.0627	down
Cpro00024025-RA	1787.77	10.8039	0.0627	down
Cpro00015005-RA	1787.64	10.8038	0.0627	down
Cpro00000512-RA	1786.62	10.803	0.0627	down
Cpro00008547-RA	1785.57	10.8022	0.0627	down
Cpro00014388-RA	1783.29	10.8003	0.0627	down
Cpro00003291-RA	1782.56	10.7997	0.0627	down
Cpro00017374-RA	1781.94	10.7992	0.0627	down
Cpro00006396-RA	1781.08	10.7985	0.0627	down
Cpro00005419-RA	1779.72	10.7974	0.0627	down
Cpro00026567-RA	1779.41	10.7972	0.0627	down
Cpro00016450-RA	1778.68	10.7966	0.0627	down
Cpro00023025-RA	1774.71	10.7934	0.0627	down
Cpro00022906-RA	1774.59	10.7933	0.0627	down
Cpro00002454-RA	1773.06	10.792	0.0627	down
Cpro00011852-RA	1772.12	10.7913	0.0627	down
Cpro00006967-RA	1772.12	10.7913	0.0627	down
Cpro00001556-RA	1770.9	10.7903	0.0627	down
Cpro00000517-RA	1769.25	10.7889	0.0627	down
Cpro00004413-RA	1768.96	10.7887	0.0627	down
Cpro00017451-RA	1768.18	10.788	0.0627	down
Cpro00025953-RA	1768.18	10.788	0.0627	down
Cpro00005271-RA	1766.88	10.787	0.0627	down
Cpro00019863-RA	1765.99	10.7863	0.0627	down
Cpro00000345-RA	1764.32	10.7849	0.0627	down
Cpro00008356-RA	1763.23	10.784	0.0627	down
Cpro00016166-RA	1762.09	10.7831	0.0627	down
Cpro00019950-RA	1762.09	10.7831	0.0627	down
Cpro00012755-RA	1761.53	10.7826	0.0627	down
Cpro00008036-RA	1760.71	10.7819	0.0627	down
Cpro00011934-RA	1758.45	10.7801	0.0627	down
Cpro00024090-RA	1756.85	10.7788	0.0627	down
Cpro00025688-RA	1756.85	10.7788	0.0627	down
Cpro00002722-RA	1756.85	10.7788	0.0627	down
Cpro00015327-RA	1752.51	10.7752	0.0627	down
Cpro00004835-RA	1751.09	10.774	0.0627	down
Cpro00009841-RA	1750.77	10.7738	0.0627	down
Cpro00020775-RA	1749.56	10.7728	0.0627	down
Cpro00019420-RA	1748.75	10.7721	0.0627	down
Cpro00011121-RA	1747.35	10.771	0.0627	down
Cpro00013509-RA	1746.45	10.7702	0.0627	down
Cpro00010958-RA	1744.56	10.7686	0.0627	down
Cpro00007503-RA	1743.5	10.7678	0.0627	down
Cpro00019216-RA	1743.11	10.7674	0.0627	down
Cpro00016886-RA	1742.79	10.7672	0.0627	down
Cpro00001314-RA	1742.79	10.7672	0.0627	down
Cpro00018023-RA	1741.42	10.766	0.0627	down
Cpro00010244-RA	1740.73	10.7655	0.0627	down
Cpro00019065-RA	1738.73	10.7638	0.0627	down
Cpro00024584-RA	1737.03	10.7624	0.0627	down
Cpro00015945-RA	1735.46	10.7611	0.0627	down
Cpro00005984-RA	1735.46	10.7611	0.0627	down
Cpro00011665-RA_	1729.82	10.7564	0.0627	down
Cpro00020414-RA	1729.82	10.7564	0.0627	down
Cpro00019182-RA	1729.82	10.7564	0.0627	down
Cpro00005632-RA	1729.82	10.7564	0.0627	down
Cpro00021487-RA	1728.36	10.7552	0.0627	down
Cpro00004046-RA	1728.05	10.7549	0.0627	down
Cpro00002251-RA	1726.02	10.7532	0.0627	down
Cpro00022679-RA	1723.5	10.7511	0.0627	down
Cpro00002870-RA	1723.19	10.7509	0.0627	down
Cpro00020473-RA	1723.05	10.7507	0.0627	down
Cpro00008963-RA	1722.84	10.7506	0.0627	down
Cpro00015462-RA	1719.1	10.7474	0.0627	down
Cpro00005500-RA	1717.8	10.7463	0.0627	down
Cpro00014033-RA	1714	10.7431	0.0627	down
Cpro00013188-RA	1714	10.7431	0.0627	down
Cpro00006279-RA	1712.42	10.7418	0.0627	down
Cpro00007043-RA	1712.42	10.7418	0.0627	down
Cpro00019144-RA	1711.02	10.7406	0.0627	down
Cpro00025693-RA	1709.06	10.739	0.0627	down
Cpro00020379-RA	1708.62	10.7386	0.0627	down
Cpro00026953-RA	1707.39	10.7376	0.0627	down
Cpro00003257-RA	1705.96	10.7364	0.0627	down
Cpro00009479-RA	1705.83	10.7363	0.0627	down
Cpro00010894-RA	1704.51	10.7351	0.0627	down
Cpro00009943-RA	1702.83	10.7337	0.0627	down
Cpro00013496-RA	1702.79	10.7337	0.0627	down
Cpro00011275-RA	1699.87	10.7312	0.0627	down
Cpro00022331-RA	1699.65	10.731	0.0627	down
Cpro00013847-RA	1699.35	10.7308	0.0627	down
Cpro00019873-RA	1698.6	10.7301	0.0627	down
Cpro00001269-RA	1697.7	10.7294	0.0627	down
Cpro00024279-RA	1696.7	10.7285	0.0627	down
Cpro00005232-RA	1692.96	10.7253	0.0627	down
Cpro00026905-RA	1691.78	10.7243	0.0627	down
Cpro00003716-RA	1691.78	10.7243	0.0627	down
Cpro00012969-RA	1691.14	10.7238	0.0627	down
Cpro00014476-RA	1690.37	10.7231	0.0627	down
Cpro00001838-RA	1689.95	10.7228	0.0627	down
Cpro00003911-RA	1689.92	10.7227	0.0627	down
Cpro00011965-RA	1686.57	10.7199	0.0627	down
Cpro00022310-RA	1686.57	10.7199	0.0627	down
Cpro00010421-RA	1685.06	10.7186	0.0627	down
Cpro00007091-RA	1684.38	10.718	0.0627	down
Cpro00009924-RA	1684.01	10.7177	0.0627	down
Cpro00001709-RA	1683.48	10.7172	0.0627	down
Cpro00016328-RA	1683.1	10.7169	0.0627	down
Cpro00010451-RA	1682.75	10.7166	0.0627	down
Cpro00018735-RA	1678.64	10.7131	0.0627	down
Cpro00016332-RA	1677.5	10.7121	0.0627	down
Cpro00010217-RA	1676.26	10.711	0.0627	down
Cpro00018659-RA	1675.49	10.7104	0.0627	down
Cpro00010943-RA	1673.94	10.709	0.0627	down
Cpro00016876-RA	1672.34	10.7077	0.0627	down
Cpro00008223-RA	1669	10.7048	0.0627	down
Cpro00009392-RA	1668.18	10.7041	0.0627	down
Cpro00004720-RA	1668.04	10.7039	0.0627	down
Cpro00009635-RA	1666.96	10.703	0.0627	down
Cpro00018337-RA	1665.75	10.702	0.0627	down
Cpro00007398-RA	1665.31	10.7016	0.0627	down
Cpro00021859-RA	1664.74	10.7011	0.0627	down
Cpro00022353-RA	1664.2	10.7006	0.0627	down
Cpro00019210-RA	1663.62	10.7001	0.0627	down
Cpro00001849-RA	1662.39	10.699	0.0627	down
Cpro00021444-RA	1661.02	10.6979	0.0627	down
Cpro00014830-RA	1658.71	10.6959	0.0627	down
Cpro00021251-RA	1658.57	10.6957	0.0627	down
Cpro00019147-RA	1658.46	10.6956	0.0627	down
Cpro00025289-RA	1658.15	10.6954	0.0627	down
Cpro00023597-RA	1657.74	10.695	0.0627	down
Cpro00019678-RA	1657.74	10.695	0.0627	down
Cpro00021947-RA	1657.74	10.695	0.0627	down
Cpro00009029-RA	1657.74	10.695	0.0627	down
Cpro00018493-RA	1656.07	10.6935	0.0627	down
Cpro00004422-RA	1655.6	10.6931	0.0627	down
Cpro00016239-RA	1655.34	10.6929	0.0627	down
Cpro00000067-RA	1655.05	10.6927	0.0627	down
Cpro00019049-RA	1653.5	10.6913	0.0627	down
Cpro00022287-RA	1653.5	10.6913	0.0627	down
Cpro00004764-RA	1653.5	10.6913	0.0627	down
Cpro00005775-RA	1649.91	10.6882	0.0627	down
Cpro00001087-RA	1649.09	10.6875	0.0627	down
Cpro00008740-RA	1649.09	10.6875	0.0627	down
Cpro00021860-RA	1645.44	10.6843	0.0627	down
Cpro00026407-RA	1645.05	10.6839	0.0627	down
Cpro00025284-RA	1645.05	10.6839	0.0627	down
Cpro00001924-RA	1644.58	10.6835	0.0627	down
Cpro00000470-RA	1644.5	10.6834	0.0627	down
Cpro00004887-RA	1644.14	10.6831	0.0627	down
Cpro00007916-RA	1642.35	10.6815	0.0627	down
Cpro00006342-RA	1642.04	10.6813	0.0627	down
Cpro00008548-RA	1641.8	10.6811	0.0627	down
Cpro00016196-RA	1641.43	10.6807	0.0627	down
Cpro00012381-RA	1639.72	10.6792	0.0627	down
Cpro00020506-RA	1637.45	10.6772	0.0627	down
Cpro00025747-RA	1633.78	10.674	0.0627	down
Cpro00017623-RA	1633.39	10.6737	0.0627	down
Cpro00026195-RA	1633.39	10.6737	0.0627	down
Cpro00016689-RA	1633.03	10.6733	0.0627	down
Cpro00017154-RA	1632.17	10.6726	0.0627	down
Cpro00022258-RA	1632.17	10.6726	0.0627	down
Cpro00005975-RA	1632.17	10.6726	0.0627	down
Cpro00026766-RA	1631.36	10.6719	0.0627	down
Cpro00024806-RA	1630.6	10.6712	0.0627	down
Cpro00017093-RA	1629.54	10.6702	0.0627	down
Cpro00002001-RA	1629.08	10.6698	0.0627	down
Cpro00008352-RA	1629.08	10.6698	0.0627	down
Cpro00025779-RA	1628.78	10.6696	0.0627	down
Cpro00009307-RA	1628.78	10.6696	0.0627	down
Cpro00000905-RA	1628.3	10.6691	0.0627	down
Cpro00005662-RA	1628.01	10.6689	0.0627	down
Cpro00025589-RA	1627.39	10.6683	0.0627	down
Cpro00000128-RA	1627.39	10.6683	0.0627	down
Cpro00023986-RA	1625.61	10.6668	0.0627	down
Cpro00007850-RA	1625.61	10.6668	0.0627	down
Cpro00011583-RA_	1624.68	10.6659	0.0627	down
Cpro00003912-RA	1624.68	10.6659	0.0627	down
Cpro00023557-RA	1623.23	10.6646	0.0627	down
Cpro00015547-RA	1622.58	10.6641	0.0627	down
Cpro00000318-RA	1622.58	10.6641	0.0627	down
Cpro00024604-RA	1622.18	10.6637	0.0627	down
Cpro00022072-RA	1620.33	10.6621	0.0627	down
Cpro00007661-RA	1619.87	10.6617	0.0627	down
Cpro00012937-RA	1618.85	10.6608	0.0627	down
Cpro00020532-RA	1618.43	10.6604	0.0627	down
Cpro00000431-RA	1618.43	10.6604	0.0627	down
Cpro00014517-RA	1617.26	10.6593	0.0627	down
Cpro00013287-RA	1616.3	10.6585	0.0627	down
Cpro00004151-RA	1615.49	10.6578	0.0627	down
Cpro00004816-RA	1615.25	10.6575	0.0627	down
Cpro00002078-RA	1614.8	10.6571	0.0627	down
Cpro00015617-RA	1614.5	10.6569	0.0627	down
Cpro00009681-RA	1614.31	10.6567	0.0627	down
Cpro00025768-RA	1611.61	10.6543	0.0627	down
Cpro00026640-RA	1611.37	10.6541	0.0627	down
Cpro00008939-RA	1611.37	10.6541	0.0627	down
Cpro00003556-RA	1609.69	10.6526	0.0627	down
Cpro00015470-RA	1606.26	10.6495	0.0627	down
Cpro00004734-RA	1606.26	10.6495	0.0627	down
Cpro00010573-RA	1602.1	10.6457	0.0627	down
Cpro00003638-RA	1601.59	10.6453	0.0627	down
Cpro00009789-RA	1599.94	10.6438	0.0627	down
Cpro00015554-RA	1598.01	10.6421	0.0627	down
Cpro00004519-RA	1596.34	10.6406	0.0627	down
Cpro00001973-RA	1595.8	10.6401	0.0627	down
Cpro00022711-RA	1595.17	10.6395	0.0627	down
Cpro00005642-RA	1595.05	10.6394	0.0627	down
Cpro00006805-RA	1593.84	10.6383	0.0627	down
Cpro00025414-RA	1593.61	10.6381	0.0627	down
Cpro00008577-RA	1593.61	10.6381	0.0627	down
Cpro00020214-RA	1593.21	10.6377	0.0627	down
Cpro00001463-RA	1591.74	10.6364	0.0627	down
Cpro00008268-RA	1590.69	10.6354	0.0627	down
Cpro00001474-RA	1590.41	10.6352	0.0627	down
Cpro00019024-RA	1590.03	10.6348	0.0627	down
Cpro00017744-RA	1589.8	10.6346	0.0627	down
Cpro00008885-RA	1589.44	10.6343	0.0627	down
Cpro00018392-RA	1588.38	10.6333	0.0627	down
Cpro00023437-RA	1586	10.6312	0.0627	down
Cpro00025679-RA	1585.67	10.6309	0.0627	down
Cpro00001888-RA	1584.36	10.6297	0.0627	down
Cpro00010262-RA	1584.14	10.6295	0.0627	down
Cpro00004920-RA	1583.18	10.6286	0.0627	down
Cpro00006535-RA	1582.87	10.6283	0.0627	down
Cpro00025440-RA	1582.64	10.6281	0.0627	down
Cpro00005377-RA	1582.32	10.6278	0.0627	down
Cpro00010452-RA	1581.16	10.6268	0.0627	down
Cpro00005949-RA	1580.01	10.6257	0.0627	down
Cpro00009698-RA	1579.88	10.6256	0.0627	down
Cpro00018553-RA	1579.19	10.625	0.0627	down
Cpro00015913-RA	1578.75	10.6246	0.0627	down
Cpro00016443-RA	1578.46	10.6243	0.0627	down
Cpro00003744-RA	1578.46	10.6243	0.0627	down
Cpro00020671-RA	1577.49	10.6234	0.0627	down
Cpro00010354-RA	1576.58	10.6226	0.0627	down
Cpro00002594-RA	1575.46	10.6216	0.0627	down
Cpro00010188-RA	1574.13	10.6203	0.0627	down
Cpro00025346-RA	1574.13	10.6203	0.0627	down
Cpro00009686-RA	1573.82	10.6201	0.0627	down
Cpro00015628-RA	1573.29	10.6196	0.0627	down
Cpro00021506-RA	1573.17	10.6195	0.0627	down
Cpro00021191-RA	1572.46	10.6188	0.0627	down
Cpro00005956-RA	1570.83	10.6173	0.0627	down
Cpro00008774-RA	1570.37	10.6169	0.0627	down
Cpro00021231-RA	1570.26	10.6168	0.0627	down
Cpro00001942-RA	1569.22	10.6158	0.0627	down
Cpro00004129-RA	1569.17	10.6158	0.0627	down
Cpro00009390-RA	1568.09	10.6148	0.0627	down
Cpro00011107-RA	1568.06	10.6148	0.0627	down
Cpro00026397-RA	1567.48	10.6142	0.0627	down
Cpro00002326-RA	1565.59	10.6125	0.0627	down
Cpro00022732-RA	1565.28	10.6122	0.0627	down
Cpro00016952-RA	1565.19	10.6121	0.0627	down
Cpro00021994-RA	1565.19	10.6121	0.0627	down
Cpro00024720-RA	1564.59	10.6116	0.0627	down
Cpro00013778-RA	1563.63	10.6107	0.0627	down
Cpro00018000-RA	1561.64	10.6088	0.0627	down
Cpro00023898-RA	1560.08	10.6074	0.0627	down
Cpro00023553-RA	1559.5	10.6069	0.0627	down
Cpro00025939-RA	1559.08	10.6065	0.0627	down
Cpro00008172-RA	1559.02	10.6064	0.0627	down
Cpro00013872-RA	1558.29	10.6057	0.0627	down
Cpro00001031-RA	1558.24	10.6057	0.0627	down
Cpro00004567-RA	1557.88	10.6054	0.0627	down
Cpro00008298-RA	1554.29	10.602	0.0627	down
Cpro00012199-RA	1553.42	10.6012	0.0627	down
Cpro00025385-RA	1553.42	10.6012	0.0627	down
Cpro00017267-RA	1552.96	10.6008	0.0627	down
Cpro00024281-RA	1550.87	10.5989	0.0627	down
Cpro00008122-RA	1550.87	10.5989	0.0627	down
Cpro00021015-RA	1550.16	10.5982	0.0627	down
Cpro00006122-RA	1549.15	10.5973	0.0627	down
Cpro00025564-RA	1548.89	10.597	0.0627	down
Cpro00022041-RA	1548.89	10.597	0.0627	down
Cpro00018238-RA	1548.55	10.5967	0.0627	down
Cpro00024417-RA	1547.44	10.5957	0.0627	down
Cpro00026638-RA	1547.31	10.5955	0.0627	down
Cpro00022881-RA	1547.11	10.5954	0.0627	down
Cpro00013861-RA	1546.02	10.5943	0.0627	down
Cpro00012543-RA	1545.09	10.5935	0.0627	down
Cpro00021196-RA	1545.09	10.5935	0.0627	down
Cpro00011274-RA	1544.95	10.5933	0.0627	down
Cpro00007504-RA	1544.04	10.5925	0.0627	down
Cpro00010336-RA	1541.27	10.5899	0.0627	down
Cpro00017235-RA	1540.94	10.5896	0.0627	down
Cpro00022439-RA	1540.62	10.5893	0.0627	down
Cpro00005619-RA	1539.91	10.5886	0.0627	down
Cpro00026433-RA	1539.57	10.5883	0.0627	down
Cpro00017193-RA	1539.33	10.5881	0.0627	down
Cpro00002791-RA	1537.62	10.5865	0.0627	down
Cpro00026285-RA	1536.42	10.5854	0.0627	down
Cpro00022898-RA	1536.22	10.5852	0.0627	down
Cpro00010384-RA	1535.88	10.5849	0.0627	down
Cpro00021546-RA	1535.5	10.5845	0.0627	down
Cpro00021615-RA	1535.21	10.5842	0.0627	down
Cpro00011939-RA	1533.25	10.5824	0.0627	down
Cpro00011764-RA	1533.25	10.5824	0.0627	down
Cpro00021831-RA	1533.25	10.5824	0.0627	down
Cpro00010643-RA	1531.89	10.5811	0.0627	down
Cpro00027020-RA	1531.17	10.5804	0.0627	down
Cpro00006958-RA	1530.01	10.5793	0.0627	down
Cpro00009128-RA	1530.01	10.5793	0.0627	down
Cpro00003785-RA	1528.1	10.5775	0.0627	down
Cpro00012987-RA	1527.69	10.5771	0.0627	down
Cpro00022117-RA	1525.32	10.5749	0.0627	down
Cpro00007659-RA	1523.03	10.5727	0.0627	down
Cpro00021857-RA	1521.6	10.5714	0.0627	down
Cpro00006468-RA	1520.99	10.5708	0.0627	down
Cpro00006642-RA	1519.15	10.5691	0.0627	down
Cpro00015294-RA	1516.7	10.5667	0.0627	down
Cpro00010620-RA	1516.7	10.5667	0.0627	down
Cpro00006346-RA	1516.61	10.5666	0.0627	down
Cpro00021501-RA	1516.21	10.5663	0.0627	down
Cpro00003849-RA	1516.02	10.5661	0.0627	down
Cpro00012382-RA	1514.85	10.565	0.0627	down
Cpro00024072-RA	1511.34	10.5616	0.0627	down
Cpro00024314-RA	1510.73	10.561	0.0627	down
Cpro00025276-RA	1510.36	10.5607	0.0627	down
Cpro00009075-RA	1510.36	10.5607	0.0627	down
Cpro00022045-RA	1510.02	10.5603	0.0627	down
Cpro00001598-RA	1506.9	10.5574	0.0627	down
Cpro00022897-RA	1506.67	10.5571	0.0627	down
Cpro00013796-RA	1505.87	10.5564	0.0627	down
Cpro00021832-RA	1505.87	10.5564	0.0627	down
Cpro00024949-RA	1505.22	10.5558	0.0627	down
Cpro00019485-RA	1504.45	10.555	0.0627	down
Cpro00005747-RA	1504.45	10.555	0.0627	down
Cpro00014337-RA	1501.3	10.552	0.0627	down
Cpro00018359-RA	1500.99	10.5517	0.0627	down
Cpro00004294-RA	1500.99	10.5517	0.0627	down
Cpro00014571-RA	1500.87	10.5516	0.0627	down
Cpro00018179-RA	1500.58	10.5513	0.0627	down
Cpro00016333-RA	1499.17	10.55	0.0627	down
Cpro00011172-RA	1499.17	10.55	0.0627	down
Cpro00010148-RA	1498.84	10.5496	0.0627	down
Cpro00016857-RA	1498.4	10.5492	0.0627	down
Cpro00014327-RA	1496.15	10.547	0.0627	down
Cpro00007776-RA	1494.71	10.5457	0.0627	down
Cpro00017282-RA	1494.43	10.5454	0.0627	down
Cpro00023844-RA	1494.01	10.545	0.0627	down
Cpro00020534-RA	1493.32	10.5443	0.0627	down
Cpro00007445-RA	1493.32	10.5443	0.0627	down
Cpro00013112-RA	1489.38	10.5405	0.0627	down
Cpro00027203-RA	1489.38	10.5405	0.0627	down
Cpro00026478-RA	1489.25	10.5404	0.0627	down
Cpro00004201-RA	1488.88	10.54	0.0627	down
Cpro00011135-RA	1488.73	10.5399	0.0627	down
Cpro00018719-RA	1488.15	10.5393	0.0627	down
Cpro00011371-RA	1488.15	10.5393	0.0627	down
Cpro00019902-RA	1488.15	10.5393	0.0627	down
Cpro00005095-RA	1488.15	10.5393	0.0627	down
Cpro00011363-RA	1486.56	10.5378	0.0627	down
Cpro00007167-RA	1485.79	10.537	0.0627	down
Cpro00012322-RA	1485.03	10.5363	0.0627	down
Cpro00004689-RA	1484.66	10.5359	0.0627	down
Cpro00009222-RA	1484.66	10.5359	0.0627	down
Cpro00012984-RA	1483.56	10.5348	0.0627	down
Cpro00016341-RA	1482.94	10.5342	0.0627	down
Cpro00011644-RA	1482.49	10.5338	0.0627	down
Cpro00008292-RA	1481.92	10.5333	0.0627	down
Cpro00013527-RA	1481.74	10.5331	0.0627	down
Cpro00024200-RA	1480.77	10.5321	0.0627	down
Cpro00001694-RA	1479.97	10.5314	0.0627	down
Cpro00000975-RA	1479.45	10.5308	0.0627	down
Cpro00008639-RA	1479.45	10.5308	0.0627	down
Cpro00019827-RA	1477.55	10.529	0.0627	down
Cpro00002950-RA	1477.55	10.529	0.0627	down
Cpro00009605-RA	1477.29	10.5287	0.0627	down
Cpro00010185-RA	1475.05	10.5266	0.0627	down
Cpro00007644-RA	1474.6	10.5261	0.0627	down
Cpro00000492-RA	1473.7	10.5252	0.0627	down
Cpro00026040-RA	1472.4	10.524	0.0627	down
Cpro00005925-RA	1472.4	10.524	0.0627	down
Cpro00008662-RA	1471.62	10.5232	0.0627	down
Cpro00024827-RA	1471.26	10.5228	0.0627	down
Cpro00023015-RA	1470.55	10.5221	0.0627	down
Cpro00015499-RA	1470.34	10.5219	0.0627	down
Cpro00001035-RA	1470.34	10.5219	0.0627	down
Cpro00003171-RA	1467.99	10.5196	0.0627	down
Cpro00014178-RA	1467.66	10.5193	0.0627	down
Cpro00015359-RA	1466.58	10.5182	0.0627	down
Cpro00009909-RA	1464.04	10.5157	0.0627	down
Cpro00025214-RA	1463.69	10.5154	0.0627	down
Cpro00010938-RA	1462.45	10.5142	0.0627	down
Cpro00017467-RA	1462.26	10.514	0.0627	down
Cpro00007120-RA	1461.69	10.5134	0.0627	down
Cpro00007062-RA	1461.69	10.5134	0.0627	down
Cpro00017943-RA	1459.53	10.5113	0.0627	down
Cpro00025897-RA	1459.12	10.5109	0.0627	down
Cpro00020162-RA	1458.51	10.5103	0.0627	down
Cpro00025793-RA	1458.09	10.5099	0.0627	down
Cpro00011296-RA	1456.77	10.5086	0.0627	down
Cpro00006776-RA	1456.58	10.5084	0.0627	down
Cpro00006085-RA	1455.67	10.5075	0.0627	down
Cpro00017230-RA	1455.42	10.5072	0.0627	down
Cpro00018484-RA	1455.08	10.5069	0.0627	down
Cpro00018650-RA	1454.62	10.5064	0.0627	down
Cpro00009257-RA	1453.94	10.5058	0.0627	down
Cpro00017350-RA	1453.12	10.5049	0.0627	down
Cpro00014250-RA	1451.81	10.5036	0.0627	down
Cpro00011106-RA	1450.81	10.5026	0.0627	down
Cpro00002239-RA	1450.33	10.5022	0.0627	down
Cpro00006402-RA	1449.67	10.5015	0.0627	down
Cpro00006783-RA	1449.4	10.5012	0.0627	down
Cpro00001799-RA	1449.4	10.5012	0.0627	down
Cpro00003160-RA	1448.94	10.5008	0.0627	down
Cpro00021801-RA	1448.88	10.5007	0.0627	down
Cpro00018469-RA	1444.52	10.4964	0.0627	down
Cpro00002363-RA	1443.98	10.4958	0.0627	down
Cpro00015643-RA	1442.96	10.4948	0.0627	down
Cpro00024441-RA	1441.98	10.4938	0.0627	down
Cpro00023464-RA	1440.61	10.4925	0.0627	down
Cpro00009515-RA	1440.04	10.4919	0.0627	down
Cpro00002851-RA	1438.9	10.4908	0.0627	down
Cpro00005952-RA	1438.58	10.4904	0.0627	down
Cpro00013863-RA	1438.47	10.4903	0.0627	down
Cpro00009776-RA	1438.16	10.49	0.0627	down
Cpro00023325-RA	1437.62	10.4895	0.0627	down
Cpro00025598-RA	1437.18	10.489	0.0627	down
Cpro00006496-RA	1436.71	10.4886	0.0627	down
Cpro00013864-RA	1436.51	10.4884	0.0627	down
Cpro00015798-RA	1435.81	10.4876	0.0627	down
Cpro00009639-RA	1435.07	10.4869	0.0627	down
Cpro00017232-RA	1434.56	10.4864	0.0627	down
Cpro00019308-RA	1433.04	10.4849	0.0627	down
Cpro00017768-RA	1432.51	10.4843	0.0627	down
Cpro00017301-RA	1431.99	10.4838	0.0627	down
Cpro00002024-RA	1431.5	10.4833	0.0627	down
Cpro00011166-RA	1430.8	10.4826	0.0627	down
Cpro00014693-RA	1430.57	10.4824	0.0627	down
Cpro00021979-RA	1430.57	10.4824	0.0627	down
Cpro00010130-RA	1430.13	10.4819	0.0627	down
Cpro00012166-RA	1429.96	10.4818	0.0627	down
Cpro00013007-RA	1429.57	10.4814	0.0627	down
Cpro00012756-RA	1429.3	10.4811	0.0627	down
Cpro00027264-RA	1428.9	10.4807	0.0627	down
Cpro00019407-RA	1428.9	10.4807	0.0627	down
Cpro00025542-RA	1428.14	10.4799	0.0627	down
Cpro00005664-RA	1427.1	10.4789	0.0627	down
Cpro00001591-RA	1426.02	10.4778	0.0627	down
Cpro00025657-RA	1425.05	10.4768	0.0627	down
Cpro00001355-RA	1424.73	10.4765	0.0627	down
Cpro00007340-RA	1424.56	10.4763	0.0627	down
Cpro00021616-RA	1424.22	10.476	0.0627	down
Cpro00021080-RA	1423.05	10.4748	0.0627	down
Cpro00008449-RA	1422.21	10.4739	0.0627	down
Cpro00002016-RA	1422.01	10.4737	0.0627	down
Cpro00005710-RA	1421.82	10.4735	0.0627	down
Cpro00025241-RA	1421.63	10.4733	0.0627	down
Cpro00007196-RA	1421.63	10.4733	0.0627	down
Cpro00015222-RA	1421.18	10.4729	0.0627	down
Cpro00008041-RA	1419.12	10.4708	0.0627	down
Cpro00011868-RA	1418.86	10.4705	0.0627	down
Cpro00005112-RA	1418.54	10.4702	0.0627	down
Cpro00016893-RA	1417.09	10.4687	0.0627	down
Cpro00018500-RA	1416.9	10.4685	0.0627	down
Cpro00002253-RA	1416.54	10.4682	0.0627	down
Cpro00004119-RA	1414.37	10.4659	0.0627	down
Cpro00018001-RA	1413.84	10.4654	0.0627	down
Cpro00003989-RA	1411.69	10.4632	0.0627	down
Cpro00016650-RA	1410.13	10.4616	0.0627	down
Cpro00015420-RA	1405.48	10.4568	0.0627	down
Cpro00018143-RA	1405.48	10.4568	0.0627	down
Cpro00011661-RA	1405.48	10.4568	0.0627	down
Cpro00012153-RA	1405.48	10.4568	0.0627	down
Cpro00023971-RA	1405.48	10.4568	0.0627	down
Cpro00023577-RA	1405.48	10.4568	0.0627	down
Cpro00025328-RA	1405.48	10.4568	0.0627	down
Cpro00021995-RA	1405.48	10.4568	0.0627	down
Cpro00022442-RA	1405.48	10.4568	0.0627	down
Cpro00021309-RA	1405.48	10.4568	0.0627	down
Cpro00005894-RA	1405.48	10.4568	0.0627	down
Cpro00006293-RA	1405.48	10.4568	0.0627	down
Cpro00005092-RA	1405.48	10.4568	0.0627	down
Cpro00007285-RA	1405.48	10.4568	0.0627	down
Cpro00009217-RA	1405.48	10.4568	0.0627	down
Cpro00004075-RA	1401.46	10.4527	0.0627	down
Cpro00023395-RA	1400.25	10.4515	0.0627	down
Cpro00005233-RA	1399.12	10.4503	0.0627	down
Cpro00008620-RA	1398.82	10.45	0.0627	down
Cpro00018239-RA	1397.06	10.4482	0.0627	down
Cpro00008842-RA	1396.04	10.4471	0.0627	down
Cpro00012118-RA	1395.37	10.4464	0.0627	down
Cpro00014114-RA	1395.37	10.4464	0.0627	down
Cpro00008543-RA	1395.37	10.4464	0.0627	down
Cpro00005641-RA	1394.8	10.4458	0.0627	down
Cpro00013649-RA	1394.5	10.4455	0.0627	down
Cpro00009938-RA	1394.41	10.4454	0.0627	down
Cpro00027255-RA	1394.14	10.4452	0.0627	down
Cpro00010201-RA	1394.05	10.4451	0.0627	down
Cpro00020148-RA	1392.81	10.4438	0.0627	down
Cpro00013049-RA	1392.58	10.4435	0.0627	down
Cpro00008949-RA	1392.58	10.4435	0.0627	down
Cpro00024106-RA	1391.96	10.4429	0.0627	down
Cpro00004306-RA	1391.96	10.4429	0.0627	down
Cpro00000102-RA	1391.56	10.4425	0.0627	down
Cpro00017429-RA	1389.68	10.4405	0.0627	down
Cpro00011084-RA	1389.68	10.4405	0.0627	down
Cpro00000591-RA	1388.12	10.4389	0.0627	down
Cpro00019951-RA	1386.74	10.4375	0.0627	down
Cpro00013098-RA	1386.4	10.4371	0.0627	down
Cpro00000970-RA	1385.68	10.4364	0.0627	down
Cpro00010448-RA	1385.25	10.4359	0.0627	down
Cpro00014884-RA	1385.11	10.4358	0.0627	down
Cpro00013000-RA_	1384.18	10.4348	0.0627	down
Cpro00001686-RA	1383.99	10.4346	0.0627	down
Cpro00015618-RA	1383.85	10.4345	0.0627	down
Cpro00008505-RA	1383.85	10.4345	0.0627	down
Cpro00010012-RA	1383.69	10.4343	0.0627	down
Cpro00013474-RA	1383.17	10.4338	0.0627	down
Cpro00001919-RA	1383.17	10.4338	0.0627	down
Cpro00014925-RA	1382.44	10.433	0.0627	down
Cpro00018567-RA	1382.44	10.433	0.0627	down
Cpro00013906-RA	1381.24	10.4318	0.0627	down
Cpro00008222-RA	1381.1	10.4316	0.0627	down
Cpro00013059-RA	1380.38	10.4308	0.0627	down
Cpro00000242-RA	1379.73	10.4302	0.0627	down
Cpro00014572-RA	1378.96	10.4294	0.0627	down
Cpro00026498-RA	1377.92	10.4283	0.0627	down
Cpro00022692-RA	1377.37	10.4277	0.0627	down
Cpro00022016-RA	1376.32	10.4266	0.0627	down
Cpro00021759-RA	1375.14	10.4254	0.0627	down
Cpro00013816-RA	1374.59	10.4248	0.0627	down
Cpro00015828-RA	1373.19	10.4233	0.0627	down
Cpro00017426-RA	1371.74	10.4218	0.0627	down
Cpro00008473-RA	1370.91	10.4209	0.0627	down
Cpro00007367-RA	1370.34	10.4203	0.0627	down
Cpro00004818-RA	1370.34	10.4203	0.0627	down
Cpro00024099-RA	1369.44	10.4194	0.0627	down
Cpro00000341-RA	1369.44	10.4194	0.0627	down
Cpro00023056-RA	1368.49	10.4184	0.0627	down
Cpro00006458-RA	1367.49	10.4173	0.0627	down
Cpro00008410-RA	1367.49	10.4173	0.0627	down
Cpro00014139-RA	1366.79	10.4166	0.0627	down
Cpro00003425-RA	1366.07	10.4158	0.0627	down
Cpro00007749-RA	1365.61	10.4153	0.0627	down
Cpro00020416-RA	1364.38	10.414	0.0627	down
Cpro00000718-RA	1363.73	10.4133	0.0627	down
Cpro00009878-RA	1363.31	10.4129	0.0627	down
Cpro00018225-RA	1362.89	10.4124	0.0627	down
Cpro00010364-RA	1362.89	10.4124	0.0627	down
Cpro00005231-RA	1362.23	10.4118	0.0627	down
Cpro00012228-RA	1361.56	10.411	0.0627	down
Cpro00014194-RA	1360.55	10.41	0.0627	down
Cpro00010346-RA	1360.14	10.4095	0.0627	down
Cpro00023968-RA	1360.14	10.4095	0.0627	down
Cpro00007235-RA	1360.14	10.4095	0.0627	down
Cpro00010879-RA	1357.95	10.4072	0.0627	down
Cpro00026117-RA	1357.01	10.4062	0.0627	down
Cpro00020801-RA	1355.77	10.4049	0.0627	down
Cpro00016534-RA	1355.28	10.4044	0.0627	down
Cpro00012019-RA	1353.07	10.402	0.0627	down
Cpro00017418-RA	1353.03	10.402	0.0627	down
Cpro00007791-RA	1352.87	10.4018	0.0627	down
Cpro00014859-RA	1352.77	10.4017	0.0627	down
Cpro00014779-RA	1352.1	10.401	0.0627	down
Cpro00024296-RA	1350.72	10.3995	0.0627	down
Cpro00007332-RA	1348.5	10.3971	0.0627	down
Cpro00014636-RA	1348.11	10.3967	0.0627	down
Cpro00024406-RA	1347.94	10.3965	0.0627	down
Cpro00001867-RA	1347.94	10.3965	0.0627	down
Cpro00003163-RA	1347.88	10.3965	0.0627	down
Cpro00021351-RA	1347.01	10.3955	0.0627	down
Cpro00020728-RA	1346.91	10.3954	0.0627	down
Cpro00000769-RA	1346.91	10.3954	0.0627	down
Cpro00019055-RA	1346.27	10.3947	0.0627	down
Cpro00007112-RA	1345.67	10.3941	0.0627	down
Cpro00023354-RA	1345.53	10.394	0.0627	down
Cpro00022948-RA	1345.05	10.3934	0.0627	down
Cpro00012651-RA	1344.78	10.3931	0.0627	down
Cpro00024210-RA	1344.37	10.3927	0.0627	down
Cpro00010436-RA	1343.7	10.392	0.0627	down
Cpro00009050-RA	1343.01	10.3913	0.0627	down
Cpro00022568-RA	1342.73	10.391	0.0627	down
Cpro00017874-RA	1342.54	10.3908	0.0627	down
Cpro00008496-RA	1342.54	10.3908	0.0627	down
Cpro00006116-RA	1341.01	10.3891	0.0627	down
Cpro00009475-RA	1339.34	10.3873	0.0627	down
Cpro00026880-RA	1338.55	10.3865	0.0627	down
Cpro00012426-RA	1337.83	10.3857	0.0627	down
Cpro00018454-RA	1337.6	10.3854	0.0627	down
Cpro00001128-RA	1337.25	10.3851	0.0627	down
Cpro00021284-RA	1336.92	10.3847	0.0627	down
Cpro00022952-RA	1336.35	10.3841	0.0627	down
Cpro00019106-RA	1336.35	10.3841	0.0627	down
Cpro00000971-RA	1336.35	10.3841	0.0627	down
Cpro00012036-RA	1336.12	10.3838	0.0627	down
Cpro00012000-RA	1335.9	10.3836	0.0627	down
Cpro00020761-RA	1335.7	10.3834	0.0627	down
Cpro00005131-RA	1335.61	10.3833	0.0627	down
Cpro00017319-RA	1335.2	10.3828	0.0627	down
Cpro00006355-RA	1334.66	10.3823	0.0627	down
Cpro00001678-RA	1333.66	10.3812	0.0627	down
Cpro00005016-RA	1333.4	10.3809	0.0627	down
[truncated: 10,350 more rows]

## Sheet: Selected 
		Seleted transcript list which displays annotated results
	Transcript ID	Seqeucne description	Fold change	log2 fold change	Adjusted P value
	Cpro00016146	Auxenochlorella protothecoides glutamine synthetase II [GSII] mRNA, complete cds	15947.3	13.961	0.0627
	Cpro00013471	Chlorella protothecoides partial mRNA for amino acid carrier [dee4 gene]	4973.23	12.28	0.0627
	Cpro00002508	Chlorella protothecoides mRNA for putative MO25 protein [dee76 gene]	4022.57	11.9739	0.0627
	Cpro00004617	Auxenochlorella protothecoides strain 0710 ATP-binding cassette transporter mRNA, complete cds (x3)	2910.84	11.5072	0.0627
	Cpro00003782	Chlorella protothecoides mRNA for putative MINE protein [dee22 gene]	2415.5	11.2381	0.0627
	Cpro00016256	Auxenochlorella protothecoides strain 0710 protein kinase mRNA, partial cds	2071.23	11.0163	0.0627
	Cpro00009886	Auxenochlorella protothecoides strain 0710 NADPH-dependent FMN reductase mRNA, partial cds (x2)	1967.67	10.9423	0.0627
	Cpro00008847	Auxenochlorella protothecoides strain 0710 chloroplast PetM subunit of cytochrome b6f complex mRNA, partial cds	1873.97	10.8719	0.0627
	Cpro00002389	Auxenochlorella protothecoides strain 0710 sucrose phosphate synthase mRNA, complete cds (x3)	1475.75	10.5272	0.0627
	Cpro00024341	Auxenochlorella protothecoides strain 0710 ribosomal protein S28e mRNA, partial cds	1413.74	10.4653	0.0627
	Cpro00014746	Auxenochlorella protothecoides strain 0710 cytochrome P450 like protein mRNA, complete cds	1284.47	10.327	0.0627
	Cpro00021156	Auxenochlorella protothecoides culture-collection CGMCC,2578 cytosine/adenosine deaminase-like protein mRNA, partial cds	1002.17	9.96891	0.0627
	Cpro00014908	Auxenochlorella protothecoides strain 0710 acyl groups transferase mRNA, complete cds (x2)	977.722	9.93328	0.0627
	Cpro00013724	Chlorella variabilis hypothetical protein [CHLNCDRAFT 16774] mRNA, partial cds	970.574	9.92269	0.0627
	Cpro00012778	Auxenochlorella protothecoides strain 0710 glucan synthase mRNA, complete cds (x3)	958.279	9.9043	0.0627
	Cpro00017034	Auxenochlorella protothecoides strain 0710 phenazine biosynthesis protein mRNA, partial cds (x2)	948.273	9.88916	0.0627
	Cpro00008515	Auxenochlorella protothecoides strain 0710 cytochrome P450 like protein mRNA, complete cds	868.088	9.7617	0.0627
	Cpro00017727	Auxenochlorella protothecoides strain 0710 plastid integral membrane protein mRNA, complete cds	663.697	9.37438	0.0627
	Cpro00010033	Auxenochlorella protothecoides strain 0710 OST3/OST6 family protein mRNA, partial cds (x2)	659.12	9.3644	0.0627
	Cpro00021939	Auxenochlorella protothecoides strain 0710 26S proteasome regulatory complex mRNA, partial cds (x2)	593.863	9.21399	0.0627
	Cpro00023449	Auxenochlorella protothecoides strain 0710 50S ribosomal protein L27 mRNA, partial cds	549.969	9.10321	0.0627
	Cpro00006025	Auxenochlorella protothecoides culture-collection CGMCC,2578 4-alpha-glucanotransferase mRNA, partial cds	448.653	8.80946	0.0627
	Cpro00000168	Auxenochlorella protothecoides strain 0710 PHD-typetranscription factor mRNA, complete cds	399.085	8.64055	0.0627
	Cpro00003072	Auxenochlorella protothecoides strain 0710 50S ribosomal protein L3 mRNA, partial cds	139.782	7.12703	0.0627
	Cpro00007215	Auxenochlorella protothecoides actin gene, complete cds (x2)	121.55	6.92541	0.0627
	Cpro00014133	Auxenochlorella protothecoides strain 0710 glycine rich protein mRNA, complete cds	56.811	5.8281	0.0627
	Cpro00015751	Chlorella variabilis argininosuccinate lyase [CHLNCDRAFT 26929] mRNA, complete cds	26.159	4.70924	0.0627
	Cpro00014004	Auxenochlorella protothecoides strain 0710 malate dehydrogenase mRNA, partial cds	17.263	4.10961	0.0627
	Cpro00007487	Chlorella protothecoides partial mRNA for putative extensin-like protein [dee189 gene]	3.567	1.83471	0.0627
	Cpro00013040	Chlorella variabilis V-type H+ ATPase subunit A [CHLNCDRAFT 56410] mRNA, complete cds	2.618	1.38847	0.0627
